1 **Versatile multi-transgene expression using improved BAC TG-**  
2 **EMBED toolkit, novel BAC episomes, and BAC-MAGIC**

3

4 **Binhui Zhao<sup>1†</sup>, Pankaj Chaturvedi<sup>1†</sup>, David L. Zimmerman<sup>1</sup> and Andrew S.**  
5 **Belmont<sup>1,\*</sup>**

6 <sup>1</sup> Department of Cell and Developmental Biology, University of Illinois, Urbana,  
7 Illinois, 61801, United States of America

8 \* To whom correspondence should be addressed. Tel: 217-244-2311; Email:  
9 [asbel@illinois.edu](mailto:asbel@illinois.edu)

10 †The authors wish it to be known that, in their opinion, the first two authors should  
11 be regarded as joint First Authors.

12 Present Address: David L. Zimmerman, Biology Department, College of the  
13 Ozarks, Point Lookout, Missouri, 65726, United States of America

14

15

16 **ABSTRACT**

17           Achieving reproducible, stable, and high-level transgene expression in  
18 mammalian cells remains problematic. Previously, we attained copy-number-  
19 dependent, chromosome-position-independent expression of reporter minigenes  
20 by embedding them within a BAC containing the mouse *Msh3-Dhfr* locus (DHFR  
21 BAC). Here we extend this “BAC TG-EMBED” approach. First, we report a  
22 toolkit of endogenous promoters capable of driving transgene expression over a  
23 0.01-5 fold expression range relative to the CMV promoter, allowing fine-tuning of  
24 relative expression levels of multiple reporter genes expressed on a single BAC.  
25 Second, we show small variability in both the expression level and long-term  
26 expression stability of a reporter gene embedded in BACs containing either  
27 transcriptionally active or inactive genomic regions, making choice of BACs more  
28 flexible. Third, we describe an intriguing phenomenon in which BAC transgenes  
29 are maintained as episomes in a large fraction of stably selected clones. Finally,  
30 we demonstrate the utility of BAC TG-EMBED by simultaneously labeling three  
31 nuclear compartments in 94% of stable clones using a multi-reporter DHFR BAC,  
32 constructed with a combination of synthetic biology and BAC recombineering  
33 tools. Our extended BAC TG-EMBED method provides a versatile platform for  
34 achieving reproducible, stable simultaneous expression of multiple transgenes  
35 maintained either as episomes or stably integrated copies.

36

37

## 38 INTRODUCTION

39 Transgene expression has been widely used in both basic research and  
40 biotechnology. Applications of transgene expression range from the elucidation  
41 of gene function by ectopic expression of selected transgenes, to the expression  
42 of transgenes for gene therapy, and to the overexpression of genes for  
43 production of biopharmaceuticals (1–5). Examples of such applications include  
44 the expression of multiple fluorescent proteins for live-cell imaging (6), the  
45 expression of the four or more Yamanaka transcription factors for efficient  
46 generation of induced pluripotent stem (iPS) cells (7), and the expression of  
47 multiple proteins for reconstitution of protein complexes (8).

48 Despite the currently widespread use of transgene expression, most  
49 transgene expression systems still suffer from serious experimental limitations.  
50 Plasmid-, lentivirus- and transposon- based systems, all still show varying  
51 degrees of chromosome position effects (9, 10) and position effect variegation  
52 (PEV) (11–15). Moreover, foreign sequences by themselves are targets for  
53 epigenetic silencing (16–19), and transgene concatamers can induce the  
54 formation of heterochromatin (20, 21). Together these transgene silencing  
55 mechanisms result in unpredictable transgene expression levels that do not  
56 correlate with copy number and are unstable with long-term culture or changes in  
57 the cell physiological or differentiated state (22–24).

58 Such limitations are compounded when the simultaneous and  
59 reproducible expression of multiple transgenes is required. For example, a  
60 common application in the emerging field of synthetic biology is the design of

61 novel gene circuits, involving the expression of multiple proteins, in many cases  
62 at precise relative levels (25). While this approach has worked well in  
63 prokaryotes and yeast, it has been difficult to implement in mammalian cells due  
64 to the lack of suitable multi-transgene expression methods which overcome  
65 chromosome position effects and allow expression of different transgenes at  
66 reproducible relative levels.

67 A commonly used approach to countering transgene silencing and  
68 variegation has been through the inclusion of *cis*-elements. These include  
69 insulators (26, 27), locus control regions (LCRs) (28, 29), scaffold/matrix  
70 attachment regions (S/MARs) (30, 31), ubiquitous chromatin opening elements  
71 (UCOEs) (32, 33) and anti-repressors (34); some of these regulatory elements  
72 have context-dependent and/or vector dependent activity. While these *cis*-  
73 elements improve transgene expression to varying degrees, they are insufficient  
74 for chromosome-position independent, copy-number-dependent transgene  
75 expression (29, 35–37).

76 Additionally, in some transgene expression applications the ability to avoid  
77 transgene chromosomal integration and eventually eliminate these transgenes  
78 from the cells is highly desirable. Both viral-sequence based and non-viral, pEPI  
79 based episomal vectors have been developed (38–41). Viral-based vectors have  
80 the potential of causing transformation of the transfected cells (42), while pEPI-  
81 like vectors, containing a S/MAR sequence immediately downstream of an active  
82 transcription unit, are mitotically stable without selection (43–47), and thus  
83 cannot be removed from the cells. Moreover, transgenes on these episomal

84 vectors are still subject to silencing (48), possibly due to the prokaryotic or viral  
85 sequences on these vectors (49, 50).

86 Bacterial artificial chromosomes (BACs) carrying ~100-200 kb mammalian  
87 genomic DNA inserts harbor most of the *cis*-regulatory sequences required for  
88 expression of the endogenous genes contained within these genomic inserts.  
89 Previously we demonstrated how embedding minigene constructs at different  
90 locations within the DHFR BAC provided reproducible expression of single or  
91 multiple reporter genes independent of the chromosome integration site (51).  
92 Similar approaches were used by other labs for high-level recombinant protein  
93 production (52, 53). Recently, our lab demonstrated stable transgene expression  
94 after cell-cycle arrest or after terminal cell differentiation, using the BAC-TG  
95 EMBED approach (54). All of these studies tested only BACs containing actively  
96 transcribed regions, based on the hypothesis that the expression level of the  
97 transgenes inserted into the BACs was determined by the chromatin  
98 environments reconstituted by the genomic inserts within the BACs. Indeed,  
99 because of this assumption, previous studies have specifically targeted the  
100 inserted transgenes to transcription units and even exons (51–53).

101 However, this hypothesis has not been tested. Moreover, overexpression  
102 from the genes on the BAC genomic inserts might change the properties of the  
103 transfected cells, or interfere with other assays of a study. Thus, BACs with no  
104 transcription units would be more desirable. Another improvement over our  
105 previous BAC TG-EMBED system (51, 54) would be a toolkit of endogenous  
106 promoters capable of driving transgene expression over a wide range of defined,

107 relative expression levels. Viral promoters, including the CMV promoter we used  
108 previously, are known to be prone to epigenetic silencing (55, 56), while most  
109 previously used endogenous and synthetic promoters were selected for their  
110 strength (53, 57–60). While high-level transgene expression is preferable in  
111 applications calling for overexpression, a low or near-physiological expression is  
112 important for many other applications, including gene therapy. Additionally,  
113 multiple transgenes may need to be expressed simultaneously but at  
114 reproducible differential levels.

115 Here we describe further extensions to the BAC TG-EMBED method that  
116 together provide a more versatile BC TG-EMBED toolkit for a range of future  
117 potential applications. First, we describe a toolkit of endogenous promoters, for  
118 which we have measured relative promoter strength, that can drive transgene  
119 expression at reproducible relative levels over a 500-fold range. Second, we  
120 show that multiple BAC scaffolds can be used to drive sustained high-level  
121 transgene expression driven by the UBC promoter without selection for up to 12  
122 weeks, including BAC scaffolds containing no active transcription units. Third,  
123 we describe an episomal version of BAC TG-EMBED, where BAC transgenes  
124 form circular, ~1 Mb episomes and can be eliminated from the cells by removing  
125 selection. Fourth, we developed a “BAC-MAGIC” (**BAC-Modular Assembly of**  
126 **Genomic loci Interspersed Cassettes**) to more rapidly assemble BACs containing  
127 multiple transgene expression cassettes. Finally, as a proof-of-principle  
128 demonstration of our new, more versatile BAC TG-EMBED toolkit, we  
129 demonstrate simultaneous expression of fluorescently tagged proteins labeling

130 three different nuclear compartments, achieving >90% optimally labeled cell

131 clones after a single, stable transfection.

132

## 133 **MATERIALS AND METHODS**

### 134 **PCR amplification of endogenous promoters**

135 Primers (Supplementary Table S1) were designed using Primer3 (61) or  
136 NCBI primer blast (62) to amplify 1-3 kb promoter regions which included either  
137 the entire or part of the 5' UTRs upstream of the first exons of target genes. We  
138 used human genomic DNA extracted from BJ-hTERT cells as the template for  
139 PCR. However, the UBC promoter, including a partially synthetic intron, was  
140 amplified from plasmid pUGG (54).

141

### 142 **Construction of dual reporter DHFR BACs**

143 The original dual reporter BAC, DHFR-HB1-GN-HB2-RZ (51), was derived  
144 from the CITB-057L22 BAC (DHFR BAC) containing mouse chr13:92992156-  
145 93161185 (mm9). DHFR-HB1-GN-HB2-RZ has an EGFP expression cassette  
146 inserted 26 kb downstream of the *Msh3* transcription start site, and a mRFP  
147 expression cassette inserted at 121 kb downstream of the *Msh3* transcription  
148 start site. The EGFP expression cassette contains a CMV promoter-driven  
149 EGFP gene and a SV40 promoter-driven Kanamycin/Neomycin resistance gene,  
150 while the mRFP expression cassette has a CMV promoter-driven mRFP gene  
151 and a SV40-driven Zeocin resistance gene. New dual reporter DHFR BACs  
152 were created using a similar strategy to that used to create DHFR-HB1-GN-HB2-  
153 RZ, except that new mRFP expression cassettes were used, where the CMV  
154 promoter was replaced with alternative, human endogenous promoters. The  
155 intermediate DHFR BAC containing only the EGFP expression cassette, DHFR-



156 HB1-GN (51), was used to insert these new mRFP expression cassettes using  $\lambda$   
157 Red-mediated homologous recombination (63, 64).

158 Plasmid p[MOD-HB2-CRZ] (51) contains a CMV driven mRFP and a SV40  
159 driven Zeocin resistance gene, flanked by two ~500 bp regions homologous to  
160 the DHFR BAC target site. Plasmid p[MOD-HB2-RCS-Zeo] was created by  
161 replacing the CMV-mRFP fragment between NotI and NheI sites of p[MOD-HB2-  
162 CRZ] with a synthetic DNA fragment “RCS” containing multiple rare restriction  
163 sites (Supplementary Table S2). The mRFP fragment generated by digesting  
164 p[MOD-HB2-CRZ] with NheI was then inserted into the NheI site of p[MOD-HB2-  
165 RCS-Zeo], yielding plasmid p[MOD-HB2-RCS-RZ]. The PCR-amplified  
166 endogenous promoters were then inserted into the RCS, generating plasmids  
167 p[MOD-HB2-promoter name-RZ]. Promoter functionality was tested by transient  
168 transfection of NIH 3T3 cells with these plasmids.

169 To insert the new mRFP expression cassettes into the DHFR-HB1-GN  
170 BAC, one round of  $\lambda$  Red-mediated recombination, using Zeocin resistance as  
171 positive selection, was performed according to a published protocol (63). DNA  
172 fragments containing the new mRFP expression cassettes with a given promoter  
173 with flanking homologous arms were excised from p[MOD-HB2-promoter name-  
174 RZ] plasmids by PmeI. SW102, a derivative strain of *Escherichia coli* (*E. coli*),  
175 was used for recombination. Recombinants were selected on low-salt LB plates  
176 containing 25  $\mu$ g/ml Zeocin and 12.5  $\mu$ g/ml Kanamycin at 32°C for ~20 hours.  
177 Recombinant colonies were screened by PCR amplification of sequences  
178 flanking the site of insertion (primers listed in Supplementary Table S1). The

179 integrity of BAC constructs was verified by restriction enzyme fingerprinting,  
180 where observed band patterns on agarose gels were compared with predicted  
181 ones.

182

### 183 **Construction of BACs containing the UBC-GFP-ZeoR cassette**

184 Construction of pUGG containing the UBC-GFP-ZeoR-FRT-GalK-FRT  
185 cassette was described previously (54). Human BACs RP11-13811 (UBB BAC),  
186 CTD-2643I7 (HBB BAC), CTD-2207K13 (2207K13 BAC) and mouse BAC RP23-  
187 401D9 (ROSA BAC) were obtained from Thermo Fisher Scientific. Mouse BAC  
188 CITB-057L22 (DHFR BAC) was a gift from Edith Heard (Curie Institute, Paris,  
189 France).

190 The UBC-GFP-ZeoR reporter gene insertion positions (mm9 or hg19) are  
191 chr17:16,301,887-16,301,888 in the UBB BAC, chr6:113,043,332-113,043,333 in  
192 the ROSA BAC, chr13:93,099,101-93,099,102 in the DHFR BAC,  
193 chr1:79,224,725-79,224,726 in the 2207K13 BAC, and chr11:5,390,233-  
194 5,390,244 in the HBB BAC.

195  $\lambda$  Red-mediated BAC recombineering (63, 64) using a *galK*-based dual-  
196 selection scheme was used to introduce the UBC-GFP-ZeoR reporter cassette  
197 onto the BACs according to published protocols (63). DNA fragments with  
198 homology ends for recombineering were prepared by PCR using primers  
199 (Supplementary Table S1) with 74-bp homology sequences plus 16-bp  
200 sequences (forward, 5'-acagcagagatccagt-3'; reverse, 5'-tgttggctagtgcgt-3') that  
201 amplify the UBC-GFP-ZeoR-FRT-GalK-FRT cassette from plasmid pUGG. *E.*

202 *coli* strain SW105 was used for BAC recombineering. Recombinants containing  
203 the UBC-GFP-ZeoR-FRT-GalK-FRT cassette were selected for *galK* insertion at  
204 32°C on minimal medium in which D-galactose was supplied as the only carbon  
205 source. Recombinant colonies were screened using PCR with BAC specific  
206 primers flanking the target regions (Supplementary Table S1). Subsequently,  
207 FLP recombinase-mediated removal of *galK* from selected recombinant clones  
208 was done by inducing actively growing SW105 cells with 0.1% (w/v) L-arabinose.  
209 Negative selection against *galK* used minimal medium containing 2-deoxy-  
210 galactose; deletion of *galK* in recombinants was again verified using BAC specific  
211 primers (Supplementary Table S1). The integrity of BAC constructs was verified  
212 by restriction enzyme fingerprinting.

213 The UBB, HBB, 2207K13, ROSA, DHFR BACs with the UBC-GFP-ZeoR  
214 reporter gene inserted were named UBB-UG, HBB-UG, 2207K13-UG, ROSA-UG  
215 and DHFR-UG, respectively.

216

### 217 **Cell culture and establishment of BAC cell lines**

218 Mouse NIH 3T3 fibroblasts (ATCC CRL-1658<sup>TM</sup>) were grown in Dulbecco's  
219 modified Eagle medium (DMEM, with 4.5 g/l D-glucose, 4 mM L-glutamine, 1 mM  
220 sodium pyruvate and 3.7 g/l NaHCO<sub>3</sub>) supplemented with 10% HyClone Bovine  
221 Growth Serum (GE Healthcare Life Sciences, Cat. # SH30541.03). Human  
222 HCT116 cells (ATCC CCL-247<sup>TM</sup>) were grown in McCoy's 5A medium  
223 supplemented with 10% Fetal Bovine Serum (Seradigm, Cat. # 1500-500H).

224 BAC DNA for transfection of mammalian cells was prepared with the  
225 QIAGEN Large Construct Kit (QIAGEN, Cat. # 12462) as per the manufacturer's  
226 instructions. All BACs except DHFR BAC derived BACs were linearized before  
227 transfection: 2207K13-UG BAC with SgrAI (New England Biolabs, Cat. #  
228 R0603S), HBB-UG BAC with NotI (New England Biolabs, Cat. # R3189S) and all  
229 other BACs with the PI-SceI (New England Biolabs, Cat. # R0696S).  
230 Lipofectamine 2000 (Thermo Fisher Scientific, Cat. # 11668019) was used to  
231 transfect the cells with the BACs according to the manufacturer's directions. The  
232 dual reporter DHFR BACs and the BACs containing the UBC-GFP-ZeoR reporter  
233 gene were transfected into NIH 3T3. The 2207K13-UG BAC was also transfected  
234 into HCT116. The DHFR BACs containing the Lac operator repeats were  
235 transfected into an NIH 3T3 cell clone 3T3\_LG\_C29 stably expressing the EGFP-  
236 dimer LacI-NLS fusion protein (EGFP-LacI) (65). Mixed clonal populations of  
237 stable transformants were obtained after ~2 weeks of selection (75 µg/ml Zeocin  
238 and 500 µg/ml G418 for NIH 3T3 cells transfected with the dual reporter DHFR  
239 BACs; 75 µg/ml or 200 µg/ml Zeocin for NIH 3T3 or HCT116 cells, respectively,  
240 transfected with the BACs containing the UBC-GFP-ZeoR reporter gene; 75  
241 µg/ml Zeocin and 200 µg/ml Hygromycin B for 3T3\_LG\_C29 transfected with the  
242 DHFR BACs); individual cell clones were obtained by serial dilution or colony  
243 picking using filter discs (66).

244 To analyze the stability of reporter gene expression in NIH 3T3 cells,  
245 individual cell clones were grown continuously with or without Zeocin (75 µg/ml)  
246 selection for 96 days. We used the following clones (Figure 4 and Supplementary

247 Figure S1): DHFR-UG BAC- f1-7, f3-13, f3-15 (uniform), f1-6, f2-1, f2-3  
248 (heterogeneous); ROSA-UG BAC- 2D6- 3C11, 3D7 (uniform), 2C12, 3A1  
249 (heterogeneous); UBB-UG BAC- 1C2, 1F1, 1F12, 2F5, 2G4, 4D3, 5C1, 5C7  
250 (uniform), 1A8, 1D5, 6H2 (heterogeneous); 2207K13-UG BAC- 3E3, 5C8, 5E1,  
251 6B9, 6E12, 6F4, 7B2 (uniform), 1E3, 6A2, 6C10, 7B9 (heterogeneous).

252

### 253 **Flow cytometry**

254 For analysis of reporter gene expression, cells were grown to ~40%-80%  
255 confluence, trypsinized, and resuspended in growth media at ~0.5-1 million/ml.

256 For analysis of the expression of mRFP and EGFP, or mRFP alone, cell  
257 suspensions were run on a BD FACS ArialI (BD Biosciences) or a BD LSR  
258 Fortessa (BD Biosciences), using the PE channel (561 nm laser and 582/15 nm  
259 bandpass filter) for mRFP, and the FITC channel (488 nm laser, 505 longpass  
260 dichroic mirror and 530/30 nm bandpass filter) for EGFP. For analysis of GFP  
261 expression alone, the cell suspensions were run on a BD FACS Canto II Flow  
262 Cytometry Analyzer (BD Biosciences), using the FITC/Alexa Fluor-488 channel  
263 (488nm laser, 502 longpass dichroic mirror and 530/30 bandpass filter).

264 Rainbow fluorescent beads (Spherotech, Cat. # RFP-30-5A) were used as  
265 fluorescence intensity standards. Each sample was run for 1-2 min or until the  
266 number of events after gating reached 10-20 thousand.

267 For cell sorting, cells were resuspended at ~10 million/ml in growth media  
268 and run on a BD FACS ArialI for up to 30-40 minutes. Sorting windows are  
269 shown in the main and supplementary figures.

270

## 271 **Estimation of relative promoter strength**

272 The red and green fluorescence of the mixed-clonal populations stably  
273 transfected with the dual-reporter DHFR BACs was measured by flow cytometry.  
274 The mean fluorescence values of all gated cells were divided by the bead intensity  
275 values for normalization. The ratio of normalized mRFP to normalized EGFP  
276 was calculated as a measure of promoter strength (Equation 1). All promoter  
277 strengths were then normalized with the CMV promoter strength (comparing the  
278 CMV-driven mRFP to the CMV-driven EGFP expression) to calculate the relative  
279 promoter strength (Equation 2) using the CMV promoter as the reference.

280

$$\text{promoter strength} = \frac{\text{median}(PE_{\text{cells}})/\text{median}(PE_{\text{beads}})}{\text{median}(FITC_{\text{cells}})/\text{median}(PE_{\text{beads}})} \quad 1$$

$$\text{relative promoter strength} = \frac{\text{promoter strength}_x}{\text{promoter strength}_{\text{CMV}}} \quad 2$$

281

## 282 **Genomic DNA extraction**

283 Genomic DNA was isolated by phenol/chloroform extraction (67). Cultured  
284 cells were harvested and washed with 1x Cell Culture Phosphate Buffered Saline  
285 (PBS, Corning, Cat. # 21040CV). Sorted cells were pelleted. Up to ~2 million cells  
286 were resuspended in 100  $\mu$ l High-TE buffer (10 mM Tris-Cl, pH 8, 10 mM EDTA,  
287 25-100  $\mu$ g/ml RNase A (QIAGEN, Cat. # 19101)) and lysed by adding 2.5  $\mu$ l 20%  
288 SDS. After incubation at 37°C for several hours, the lysate was digested by ~0.2  
289 mg/ml Proteinase K (New England Biolabs, Cat. # P8102 or P8107S) at 55°C for

290 ~1 day. 1 M Tris-Cl (pH 8.0), 5 M NaCl and nuclease free water were added to  
291 the lysate to bring up the total volume to ~600  $\mu$ l and final concentrations of Tris-  
292 Cl to ~0.1 M and NaCl to ~0.2 M. The lysate was then extracted once with an  
293 equal volume of phenol/chloroform/isoamyl alcohol (25:24:1 mixture, Fisher  
294 Scientific, Cat. # BP1752I-400) and once with an equal volume of  
295 chloroform/isoamyl alcohol (24:1 mixture, MilliporeSigma, Cat. # C0549). DNA  
296 was precipitated by adding 2.5 volumes of 100% ethanol, washed with 70%  
297 ethanol and resuspended in EB (10mM Tris-Cl, pH 8.5).

298

### 299 **Estimation of transgene copy number**

300 BAC or plasmid transgene copy number within individual cell clones or  
301 sorted cells was measured by real-time quantitative PCR (qPCR), using purified  
302 genomic DNA, iTaq universal SYBR Green Supermix (Bio-Rad Laboratories, Cat.  
303 # 1725121) and a StepOnePlus (Applied Biosystems). Relative quantitation  
304 methods were used for copy number calculation. Primers used for qPCR are  
305 listed in Supplementary Table S1. Mouse genes *Sgk1* and *Hprt1* were used as  
306 endogenous controls, assuming four copies of each gene per cell in NIH 3T3.  
307 For Figure 3d and Figure 5c, a primer pair (Zeo-GFP2for/rev) that binds to the  
308 UBC-GFP-ZeoR region was used to estimate transgene copy number. For Table  
309 2, Table 3 and Supplementary Figure S5, in addition to Zeo-GFP2for/rev, 4  
310 primer pairs binding to the DHFR BAC or 6 primer pairs binding to the HBB BAC  
311 were used to estimate the copy number of DHFR-UG or HBB-UG BAC,  
312 respectively. The  $\Delta C_T$  method (Equations 3 and 5) was used to estimate the copy

313 numbers of the PCR amplification regions on the UBC-GFP-ZeoR reporter gene  
314 or on the HBB BAC, and  $\Delta\Delta C_T$  method (Equations 4 and 6) was used to estimate  
315 the copy numbers of the PCR amplification regions on the DHFR BAC. When  
316 multiple primer pairs were used for a region, the mean copy number of all PCR  
317 amplification regions was calculated as the copy number of that region.  
318 Equations 3 and 7 were used to calculate the fold increase of BAC copy numbers  
319 in H1 and H2 samples relative to L.

320

$$\Delta C_T = C_{T_{\text{test region}}} - (C_{T_{Sgk1}} + C_{T_{Hprt1}})/2 \quad 3$$

$$\Delta\Delta C_T = \Delta C_{T_{\text{transgene clone}}} - \Delta C_{T_{\text{NIH 3T3}}} \quad 4$$

$$\text{copy number}_{\Delta C_T} = 4 \times 1.95^{-\Delta C_T} \quad 5$$

$$\text{copy number}_{\Delta\Delta C_T} = 4 \times 1.95^{-\Delta\Delta C_T} \quad 6$$

$$\text{BAC fold increase} = 1.95^{\Delta C_{T_L} - \Delta C_{T_{H1|H2}}} \quad 7$$

321

## 322 **Correlation of reporter gene expression and reporter gene copy number**

323 Mean fluorescence intensity (in arbitrary units) of individual clones were  
324 measured by flow cytometry and normalized by fluorescent bead intensity to be  
325 used as a measure of reporter gene expression. To ensure uniform  
326 normalization for all samples, fluorescent beads from the same batch were used  
327 for all measurements. Untransfected cells were used to establish background  
328 fluorescence levels. Linear correlations of GFP expression level versus  
329 transgene copy number for each group of cell clones were calculated using the



330 linear trend line tool in Microsoft Excel with the y-intercept fixed to 0

331 (autofluorescence normalized by beads was almost 0).

332

### 333 **DNA FISH probes**

334 Biotin or digoxigenin labeled DNA FISH probes were made from BAC  
335 DNA, using a published protocol (68), with the following reagents: AluI, DpnI,  
336 HaeIII, MseI, MspI, RsaI (New England Biolabs, Cat. # R0137S, R0176S,  
337 R0108S, R0525S, R0106S, R0167S, respectively) and CutSmart Buffer (New  
338 England Biolabs); Terminal Deoxynucleotidyl Transferase and reaction buffer  
339 (Thermo Fisher Scientific, Cat. # EP0161); dATP (New England Biolabs, Cat. #  
340 N0446S) and Biotin-14-dATP (Thermo Fisher Scientific, Cat. # 19524016) for  
341 biotin labelling, or dTTP (New England Biolabs, Cat. # N0446S) and Digoxigenin-  
342 11-dUTP (MilliporeSigma, Cat. # 11093088910) for digoxigenin labelling.

343

### 344 **3D DNA FISH**

345 DNA FISH of interphase nuclei used published protocols (69, 70) with  
346 small modifications. Cells grown on coverslips (12 mm diameter) were fixed with  
347 3-4% paraformaldehyde in Dulbecco's phosphate buffered saline (DPBS, 8 g/l  
348 NaCl, 0.2 g/l KCl, 2.16 g/l Na<sub>2</sub>HPO<sub>4</sub>-7H<sub>2</sub>O, 0.2 g/l KH<sub>2</sub>PO<sub>4</sub>) for 10 min, followed  
349 by permeabilization with 0.5% Triton X-100 (Thermo Fisher Scientific, Cat. #  
350 28314) in DPBS for 10-15 min. Cells were subjected to six freeze-thaw cycles  
351 using liquid nitrogen, immersed in 0.1M HCl for 10-15 min, and then washed 3x  
352 with 2x saline-sodium citrate (SSC). Freeze-thaw cycles sometimes were

353 skipped with no noticeable difference in FISH signals. Cells were incubated in  
354 50% deionized formamide (MilliporeSigma, Cat. # S4117)/2x SSC for 30 min at  
355 room temperature (RT), and stored for up to 1 month at 4°C. Each coverslip  
356 used ~4 µl hybridization mixture, consisted of 5-20 ng/µl probes, 10x of mouse  
357 (for NIH 3T3 cells) or human (for HCT116 cells) Cot-1 DNA (Thermo Fisher  
358 Scientific Cat. # 18440016 or 15279011,) per ng probe, 50% deionized  
359 formamide, 10% dextran sulfate (MilliporeSigma, Cat. # D8906) and 2x SSC.  
360 Cells and probes were denatured together on a heat block at ~76°C for 2-3 min  
361 and hybridized at 37°C for 16 hrs-3 days. After hybridization, cells were washed  
362 3 x 5 min in 2x SSC at RT, and for 3 x 5 min in 0.1x SSC at 60°C, and then  
363 rinsed with SSCT (4x SSC with 0.2% TWEEN 20) at RT. FISH signals were  
364 detected by incubation with Alexa Fluor 647 conjugated Streptavidin (1:200;  
365 Jackson ImmunoResearch, Cat. # 016-600-084) or Alexa 594 conjugated  
366 Streptavidin (1:200; Life Technology, Cat. # S11227) for biotin-labeled probes, or  
367 Alexa Fluor 647 conjugated IgG fraction monoclonal mouse anti-digoxin (1:200;  
368 Jackson ImmunoResearch, Cat. # 200-602-156) for digoxigenin labeled probes,  
369 diluted in SSCT with 1% Bovine Serum Albumin (MilliporeSigma, Cat. # A7906),  
370 for 40 min-2 hrs at RT. Coverslips were washed in SSCT for 4 × 5 min, rinsed  
371 with 4x SSC and mounted.

372

### 373 **Mitotic FISH**

374 Metaphase spreads were prepared according to a published protocol (71)  
375 with small modifications. Cells grown to 70-80% confluence were incubated with

376 0.1 µg/ml Colcemid (Thermo Fisher Scientific, Cat. # 15212012) in growth media  
377 for ~1 hr. Cells were then harvested and swollen by incubation in 0.075 M KCl  
378 for 10-20 min at 37°C, followed by fixation with freshly prepared Carnoy's fixative  
379 (3:1 v/v ratio of methanol/acetic acid). Chromosomal spreads were made by  
380 dropping the fixed swollen cells onto cold wet glass slides. DNA FISH of mitotic  
381 spreads was performed using a published protocol (71).

382

### 383 **Microscopy and image analysis**

384 For examining EGFP-LacI signals cells were grown on coverslips and  
385 fixed with 3-4% paraformaldehyde in DPBS before mounting. For examining the  
386 expression of the three reporter minigenes, SNAP tagged-Lamin B1, SNAP-  
387 tagged Fibrillarin and mCherry-Magoh, the cells were first labeled with cell-  
388 permeable substrate SNAP-Cell Fluorescein (New England Biolabs, Cat. #  
389 S9107S) overnight at 240 nM concentrations. To reduce background of  
390 unreacted SNAP-tag substrate, cells were incubated 3x 30 mins with media in  
391 the incubator, washed with PBS, and fixed with freshly prepared 4%  
392 paraformaldehyde in PBS for 15 min at RT. All samples- including fixed cells  
393 expressing fluorescently tagged transgenes, 3D DNA FISH, and mitotic FISH  
394 sample- were mounted with a Mowiol-DABCO anti-fade medium (72) containing  
395 ~3 µg/ml DAPI (MilliporeSigma, Cat. # D9542).

396 3D z-stack images were acquired using a Deltavision wide-field  
397 microscope (GE Healthcare), equipped with a Xenon lamp, 60X, 1.4 NA oil  
398 immersion objective (Olympus) and CoolSNAP HQ CCD camera (Roper

399 Scientific) or a V4 OMX (GE healthcare) microscope, equipped with a 100X, 1.4  
400 NA oil immersion objective (Olympus) and two Evolve EMCCDs (Photometrics).  
401 Images were deconvolved using the deconvolution algorithm (72) provided by the  
402 *softWoRx* software (GE Healthcare). Gamma = 0.5 was applied to green  
403 channels in Figure 5e, Supplementary Figure S8 and Supplementary Figure S10  
404 for proper display of spots with relatively low signals. All image analysis and  
405 preparation were done using Fiji (73). Images were assembled using Illustrator  
406 (Adobe), Photoshop (Adobe), or GIMP.

407 For estimation of episome size, the z-sections containing focused episome  
408 images for the DAPI and FISH channels were selected manually from the  
409 deconvolved z-stack image. Chromosomes and FISH spots were segmented by  
410 applying the k-mean clustering algorithm (number of clusters = 3, cluster center  
411 tolerance = 0.0001, randomization seed = 48) from the IJ Plugins Toolkit ([http://ij-](http://ij-plugins.sourceforge.net/plugins/toolkit.html)  
412 [plugins.sourceforge.net/plugins/toolkit.html](http://ij-plugins.sourceforge.net/plugins/toolkit.html)). The smallest chromosome was  
413 identified by manually searching for the chromosome with the smallest area.  
414 Segmented FISH spots overlapping or touching chromosomes were removed  
415 manually. Integrated DAPI intensities of the smallest chromosome and of the  
416 FISH spots not overlapping or touching chromosomes were calculated by  
417 Equation 8 (Mean gray value and Area were measured by Fiji). Average  
418 episome size was calculated by Equation 9 (n is the number of FISH spots, chro  
419 is the smallest chromosome found in the field, 61.4 Mb is the size of chr19 in  
420 mm10).  
421

$$\text{integrated density} = (\text{Mean gray value} - 200) \times \text{Area} \quad 8$$

$$\text{episome size} = \frac{\text{integrated density}_{\text{FISH}}}{n \times \text{integrated density}_{\text{chro}}} \times 61.4 \text{ Mb} \quad 9$$

422

423           Comparison of reporter gene expression levels in for NIH 3T3 cell clones

424 (Figure 7c) was done by projecting deconvolved images stacks and then

425 measuring the integrated intensity within individual nuclei after subtracting

426 background intensity levels measured in the cytoplasm. Regions of interest

427 circumscribing individual nuclei were drawn manually based on the SNAP-lamin

428 B1 signal. Linear correlations of the integrated intensities of the nuclear SNAP-

429 tag and mCherry signals were calculated using Microsoft Excel with the y-

430 intercept fixed to 0.

431           A non-linear Gamma correction (0.7) to reduce the grey-scale dynamic

432 range followed by a maximum intensity projection of 3-4 z-sections was used to

433 better visualize both lamin and nucleolar staining simultaneously (Figure 7d).

434

### 435 **Agarose embedded DNA preparation and S1 Nuclease digestion**

436           Agarose embedded DNA was prepared according to published protocols

437 (74, 75) with modifications. To prepare mammalian cell suspensions, cells were

438 grown without selection for 3-4 days after passaging, reaching 80%-90%

439 confluence. Cells were trypsinized, resuspended in cell media, washed with

440 PBS, and resuspended in PBS at a concentration of  $\sim 8 \times 10^6$  cells / 100  $\mu$ l. To

441 prepare *E. coli* cell suspensions,  $\sim 0.1$  ml of overnight culture was diluted in 15 ml

442 fresh LB and grown to an OD<sub>600</sub> of  $\sim 1$ . Cells were washed with L Buffer (10 mM

443 Tris-Cl pH7.6, 20 mM NaCl, 100 mM EDTA) once and resuspended in L Buffer at  
444 a concentration of  $\sim 10^9/100 \mu\text{l}$ , assuming a cell concentration of  $\sim 8 \times 10^7/100 \mu\text{l}$   
445 at an  $\text{OD}_{600}$  of 1.

446 2% certified low melt agarose (Bio-Rad Laboratories, Cat. # 1613111) was  
447 prepared with L Buffer and kept at  $75^\circ\text{C}$ . Equal volumes of the cell suspension  
448 (RT) and the agarose solution ( $75^\circ\text{C}$ ) were mixed and immediately transferred to  
449 plug molds (Bio-Rad Laboratories, Cat. # 1703713),  $\sim 100 \mu\text{l}$  mixture per plug.  
450 The agarose plugs were incubated in L Buffer with 1% Sarcosyl (MilliporeSigma,  
451 Cat. # L5125) and 0.5 mg/ml proteinase K at  $55^\circ\text{C}$  for 1-2 days. The agarose  
452 plugs were washed with W Buffer (20 mM Tris-Cl, pH7.6, 50 mM EDTA) for 2 x  
453 15 min, incubated in 1 mM PMSF in W Buffer for 30 min, and washed with W  
454 Buffer again. Prepared agarose plugs were stored in 0.5 M EDTA at  $4^\circ\text{C}$  before  
455 use.

456 For S1 Nuclease (Promega, Cat. # M5761) digestion, agarose plugs were  
457 first washed in TE (10 mM Tris-Cl, 1 mM EDTA, pH 7.6) for 3 x 10 min and in 1x  
458 S1 Nuclease Buffer for 20 min on ice. The agarose plugs were then digested  
459 with 1-16 U/0.4 ml S1 Nuclease in 1x S1 Nuclease Buffer at  $37^\circ\text{C}$  for 45 min.  
460 The reaction was stopped by washing the agarose plugs with 0.5 M EDTA or W  
461 Buffer.

462

### 463 **Pulsed Field Gel Electrophoresis (PFGE)**

464 PFGE was performed using a CHEF-DR III (Bio-Rad Laboratories)  
465 according to the manufacturer's manual using a 1% certified megabase agarose

466 (Bio-Rad Laboratories, Cat. # 1613108) gel in 0.5x Tris-borate-EDTA buffer  
467 (TBE), a 0.5x TBE running buffer, and the following parameters: voltage = 6  
468 V/cm, angle = 120°, pulse = 60-120 sec, temperature = 14 °C, run time = 20 or  
469 24 hrs (stopped at 18-20 hrs). Yeast chromosomes (Bio-Rad Laboratories, Cat.  
470 # 170-3605) were used as DNA size markers.

471

### 472 **Southern hybridization probes**

473 Southern hybridization probes were created and labeled with digoxigenin  
474 by PCR using primers listed in Supplementary Table S1. Set 1 contains a 620bp  
475 and a 615 bp fragment amplified from the GFP-ZeoR region; Set 2 contains 525  
476 bp, 534 bp, and 504bp fragments amplified from the BAC vector region; Set 3  
477 contains 446 bp, 681 bp, and 424 bp fragments amplified from the HBB BAC.  
478 Pooled Set 1 and Set 2 fragments were used for detecting the DHFR BAC, and  
479 pooled Set 1 and Set 3 for detecting the HBB BAC. PCR was done using *Taq*  
480 DNA polymerase (New England Biolabs, Cat. # M0267L) with the following  
481 recipe: 1x ThermoPol Buffer, 0.2 mM dATP/dCTP/dGTP (New England Biolabs,  
482 Cat. # N0446S), 0.165 mM dTTP (New England Biolabs, Cat. # N0446S), 0.035  
483 mM Digoxigenin-11-dUTP, 0.5 ng HBB BAC, 1.25 U *Taq* DNA polymerase, 0.5  
484 µM forward/reverse primers, 50 µl total reaction volume. PCR products were  
485 column (QIAGEN, Cat. # 28104) purified. Pooled probes were denatured in  
486 nuclease free water, at ~100°C for ~10 min and snap-chilled on ice before use.  
487

### 488 **Southern hybridization**

489 Southern blotting used a published protocol (76) with modifications. After  
490 ethidium bromide staining and imaging, the gel was depurinated in 0.25 M HCl  
491 for 2x 30 min, denatured in 0.4 M NaOH for 2x 25 min, neutralized in 0.5 M Tris-  
492 Cl/1.5 M NaCl (pH 7.6) for 2x 20 min and washed in 2x SSC for 2x 20 min. DNA  
493 was transferred to Zeta-Probe membranes (Bio-Rad Laboratories, Cat. #  
494 1620165) using a Model 785 Vacuum Blotter (Bio-Rad Laboratories), with 2x  
495 SSC as transfer buffer, ~5 inches Hg pressure, and ~16 hrs transfer time. A  
496 Stratalinker (Stratagene) was used to cross-link DNA to the membrane.

497 Hybridization used a standard protocol (77) with modifications. The  
498 hybridization buffer was composed of 1:1 volumes of 1 M Na<sub>2</sub>HPO<sub>4</sub> (pH 7.2) and  
499 14% (w/v) SDS. Total concentration of pooled probes was ~100 ng/ml.  
500 Hybridization was carried out at 65°C for ~16 hrs. After hybridization, the  
501 membrane was washed with 2x SSC/0.1% SDS for 2 x 5 min at room  
502 temperature, and with 1x SSC/0.1% SDS for 2 x 10 min at 65°C and rinsed with  
503 2x SSC. Signals were detected using the DIG Nucleic Acid Detection Kit  
504 (MilliporeSigma, Cat. # 000000011175041910) according to the manufacturer'  
505 manual, except that in the final step, CDP-*Star* (MilliporeSigma, Cat. #  
506 11685627001) was used instead of NBT/BCIP, and the membrane was imaged  
507 by an iBright system (Thermo Fisher Scientific).

508

### 509 **Estimation of average BAC DNA content per episome**

510 To estimate the average BAC DNA content per episome of clone DHFR-  
511 UG-s3 and clone HBB-UG-100d3, cells at the same passage were seeded on



512 glass coverslips for DNA FISH using BAC probes, and in different plates for  
513 genomic DNA extraction followed by qPCR. The mean number of FISH spots  
514 per nucleus, counted from z-stack projected images, provided the average  
515 episome copy number per cell. For the DHFR-UG clone, 3 was subtracted from  
516 the mean number of FISH spots, as the parental NIH 3T3 cells had ~3 FISH  
517 spots, corresponding to the endogenous DHFR loci, using FISH probes prepared  
518 from the DHFR BAC. qPCR estimation of BAC copy number per cell was  
519 described in section “Estimation of transgene copy number”. BAC DNA content  
520 per episome was calculated using equation 10.

521

$$\text{BAC content per episome} = \frac{\text{BAC copy number per cell}}{\text{episome copy number per cell}} \times \text{BAC size} \quad 10$$

522

### 523 **Whole genome sequencing**

524 Clone DHFR-UG-s3 and clone HBB-UG-100d3 were sorted by flow  
525 cytometry using the H1, H2 and L sorting windows shown in Figure 6c and  
526 Supplementary Figure S4a. Cells from the H2 and L regions were sorted in the  
527 same experiment, while cells from the H1 regions were sorted in another  
528 experiment. 100-200 thousand cells were collected from each window. Genomic  
529 DNA from sorted cells was isolated by phenol-chloroform extraction. To prepare  
530 sequencing libraries, genomic DNA was first fragmented to 100-500 bp by  
531 sonication using a Bioruptor Pico (Diagenode), with the following conditions: 4  
532 ng/ $\mu$ l DNA in 120  $\mu$ l EB, 1.5 ml tube, 10-11 cycles of 30 secs on and 30 secs off.  
533 Next, indexed adaptors was attached to the fragmented DNA using True-Seq

534 ChIP Sample Preparation kit (Illumina, Cat. # IP-202-1012) according to the  
535 manufacturer's instructions with the following modifications: after the fragmented  
536 DNA was end repaired, 3' end adenylated, and ligated to indexed adaptors  
537 without size selection, the ligation products were PCR amplified for 7~9 cycles.  
538 Libraries were quality checked on a Fragment Analyzer (Agilent) and quantitated  
539 by qPCR. Every 6 libraries were pooled at equal molar ratios and sequenced on  
540 one lane using a HiSeq 4000 for 101 cycles from one end of the fragments using  
541 a HiSeq 4000 sequencing kit version 1. Fastq files were generated and de-  
542 multiplexed with the bcl2fastq v2.20 Conversion Software (Illumina). Library  
543 quality checking, quantitation and sequencing, and fastq file generation and de-  
544 multiplexing were done by the DNA services lab, Roy J. Carver Biotechnology  
545 Center, UIUC. 59-65 million reads with quality score >30 were obtained for each  
546 library.

547

#### 548 **Sequencing reads processing and copy number variation analysis**

549 Low quality bases and adaptor sequences were trimmed from raw reads  
550 using cutadapt 1.14 with Python 2.7.13 with the following parameters: -a  
551 AGATCGGAAGAGCACACGTCTGAACTCCAGTCAC -q 20,20 -m 20, resulting  
552 in ~0.2% bp being trimmed. Reads were then aligned to a reference genome  
553 (mm10 plus HBB BAC (CTD-2643I7, sequence from hg38), the BAC vector  
554 (pBelo11, GenBank Accession #: U51113) and UBC-GFP-ZeoR, each as an  
555 individual chromosome) using Bowtie2 (version 2.3.2) with default parameters.  
556 Overall alignment rate of each sample was ~98%-99%. Finally, PCR duplicates

557 were removed by SAMtools rmdup (version 1.7) with default parameters,  
558 resulting in 42-48 million total mapped reads in each sample.

559 For reads binning, each chromosome of the reference genome was  
560 divided into non-overlapping 3 kb or 30 kb bins; the number of alignments with  
561 centers falling into each bin (binned reads) was counted and then divided by the  
562 mean read count (Equation 11), generating normalized binned reads (normalized  
563 reads, Equation 12), and finally the normalized binned reads of the test sample  
564 (H1 or H2 cells) were divided by that of the reference sample (L cells), generating  
565 the ratio of normalized binned reads (ratio, Equation 13). The mean read count  
566 was ~50 or ~500 for 3 kb or 30 kb bin size, respectively. To reduce noise caused  
567 by extremely low read counts, a threshold for determining outliers was calculated  
568 based on the quantile range (Equation 14). Bins with  $\log_2(\text{reads})$  smaller than  
569 the threshold in the test sample were removed from further analysis. The  
570 excluded bins took up ~6.0% of total bins for both 3 kb and 30 kb bin sizes,  
571 including zero read count bins, which took up ~5.5% or ~3.5% of total bins for 3  
572 kb or 30 kb bin size, respectively. The maximum number of reads of the  
573 excluded bins were ~7 or ~108 for 3 kb or 30 kb bin size, respectively.

574

$$\text{mean read count} = \frac{\text{total mapped reads} \times \text{bin size}}{\text{reference genome size}} \quad 11$$

$$\log_2(\text{normalized reads}) = \begin{cases} \log_2 \frac{\text{binned reads}}{\text{mean read count}}, & \text{binned reads} > 0 \\ \log_2 \frac{0.1}{\text{mean read count}}, & \text{binned reads} = 0 \end{cases} \quad 12$$

$$\log_2(\text{ratio}) = \log_2 \frac{\text{reads}_{\text{H1|H2}}}{\text{reads}_{\text{L}}} \quad 13$$

$$\text{outlier threshold} = 25\% \text{ quantile} - 4 \times (75\% \text{ quantile} - 25\% \text{ quantile}) \quad 14$$

575

576           A circular binary segmentation algorithm (78, 79) from the R-package  
577 DNACopy (version 1.52.0) was used to merge bins with similar  $\log_2(\text{ratio})$  into  
578 segments, with the following parameters for the segment function: verbose = 1,  
579 undo.splits="sdundo", undo.SD=1. The mean  $\log_2(\text{ratio})$  of each segment was  
580 calculated for identifying episome-localizing regions.

581           To identify possible episome-localizing regions, we first measured BAC  
582 transgene copy numbers in the H1, H2 and L samples by qPCR and then  
583 calculated the theoretical episome copy numbers using the estimated BAC copy  
584 number per episome of unsorted cells (Table 2). The minimum copy number  
585 increase of episome-localizing host DNA (minimum increase) was then  
586 calculated assuming NIH 3T3 to be tetraploid and each episome to have the  
587 same host DNA sequence (Equation 15). Segments with mean  $\log_2(\text{ratio})$  equal  
588 to or greater than  $\log_2(\text{minimum increase})$  in both H1 and H2 samples were  
589 selected as candidate episome-localizing regions.

590

$$\text{minimum increase}_{\text{H1|H2}} = \frac{\text{episome copy number}_{\text{H1|H2}} + 4}{\text{episome copy number}_{\text{L}} + 4} \quad 15$$

591

592 **Construction of DHFR BAC deletions**

593 We tested several DHFR BAC deletions- made for other purposes- for their  
594 ability to produce episomes. The DHFR-c27 BAC (51) containing a 256-mer Lac  
595 operator (LacO) repeats and a CMV-mRFP-SV40-ZeoR expression cassette was  
596 derived from the DHFR BAC, and was used for making the DHFR BAC deletions.  
597 DHFR-c27d2 contains a ~70 kb deletion of the 3' part of the *Msh3* gene. DHFR-  
598 c27d3-crz contains a ~80 kb deletion of the whole *Dhfr* gene and the 5' part of the  
599 *Msh3* gene, including the CMV-mRFP-SV40-ZeoR expression cassette inserted in  
600 the *Msh3* gene, and contains a new CMV-mRFP-SV40-ZeoR expression cassette  
601 introduced at the remaining part of *Msh3* gene. DHFR-c27d4 contains a ~20 kb  
602 deletion around the divergent promoter region.  $\lambda$  Red-mediated BAC  
603 recombineering with a *galk*-based dual-selection scheme was used to create the  
604 deletion BACs from the DHFR-c27 BAC, as described in "Construction of dual  
605 reporter DHFR BACs" and "Construction of BACs containing the UBC-GFP-ZeoR  
606 cassette". DNA fragments containing either *Galk* or FRT-*Galk*-FRT and homology  
607 ends were produced by PCR using either p*Galk* or pUGG as templates. For  
608 DHFR-c27d2, the *Galk* cassette was introduced by the first round of recombination  
609 and was subsequently removed by another round of recombination using a DNA  
610 fragment created by a pair of partially overlapping primers. For DHFR-c27d3 and  
611 DHFR-c27d4, the FRT-*Galk*-FRT cassette was introduced in the first round  
612 instead and was subsequently removed by inducing FLP recombinase as  
613 described in "Construction of BACs containing the UBC-GFP-ZeoR cassette". To  
614 create DHFR-c27d3crz, the CMV-mRFP-SV40-ZeoR cassette was introduced into  
615 DHFR-c27d3 by one round of recombination using Zeocin resistance as positive

616 selection as described in “Construction of dual reporter DHFR BACs”. Each round  
617 of recombination was validated by PCR and restriction enzyme fingerprinting. All  
618 primers are listed in Supplementary Table S1.

619

620

### 621 **Construction of multi-reporter DHFR BAC by BAC-MAGIC**

622 **Overview:** Construction of the 3-reporter BAC was done by serially  
623 inserting ~10-15 kb DNA cassettes into the DHFR BAC scaffold by BAC  
624 recombineering. These DNA cassettes were constructed from two different DNA  
625 plasmid module types: reporter modules and intervening DHFR sequence  
626 modules. DNA cassettes were inserted sequentially into the DHFR BAC using  
627 multiple rounds of BAC recombineering and positive selection with one of two  
628 different positive selectable markers. After insertion of the first DNA cassette,  
629 each subsequent insertion of the next DNA cassette removed the preceding  
630 positive selectable located at the 3' end of the preceding cassette while inserting  
631 the alternative selectable marker located at the 3' end of the new cassette.

632 Three reporter gene modules (Rep Mod 01, 02, 03) plus three intervening DHFR  
633 sequence modules (DHFR 02, 03, 04) were constructed and then inserted into  
634 the DHFR BAC using 6 sequential rounds of BAC recombineering. In this way,  
635 45 kb of the original DHFR BAC effectively was reconstructed such that the  
636 original DHFR sequences were retained but the 3 reporter mini-genes were  
637 inserted into this BAC region with each reporter minigene spaced by ~10 kb of

638 DHFR sequence. We call this overall construction approach BAC-MAGIC (**BAC-**  
639 **M**odular **A**ssembly of **G**enomic loci **I**nterspersed **C**assettes).

640 Each DNA cassette was constructed using traditional cloning methods,  
641 Gibson assembly (80), and/or DNA Assembler (81, 82). Three reporter recipient  
642 modules (pRM01-Spec, pRM02-Spec, and pRM03-Spec) were designed to  
643 incorporate a rare AgeI restriction site for insertion of reporter expression  
644 cassettes of choice, in order to create the final reporter modules for BAC  
645 recombineering. Unless mentioned specifically all the enzymes were procured  
646 from New England Biolabs. All primers and oligos are listed in Supplementary  
647 Table S1. Gibson assembly used Gibson assembly cloning kit (New England  
648 Biolabs, Cat. # E5510S) as per the manufacturer's instructions.

649 DNA Assembler used *Saccharomyces cerevisiae* (*S. cerevisiae*) strain  
650 VL6-48N (MAT $\alpha$ , his3- $\Delta$ 200, trp1- $\Delta$ 1, ura3- $\Delta$ 1, lys2, ade2-101, met14, cir $^{\circ}$ ),  
651 transformed with 43 fmol pRS413 vector backbone and 130 fmol of all other  
652 fragments using the LiAc/SS carrier DNA/PEG method (83). The *S. cerevisiae*  
653 single-copy shuttle vector pRS413 contains CEN6/ARS autonomously replicating  
654 sequence, auxotrophic selection marker *HIS3* for propagation in yeast, and  
655 pMB1 origin of replication and *bla* (Ap<sup>R</sup>) marker for selection with ampicillin in *E.*  
656 *coli*. The 3.8 kb pRS413 vector backbone was PCR amplified from plasmid  
657 pRS413 (New England Biolabs) using primer pair RS413-Fw/RS413-Rev for all  
658 yeast assembly reactions. The vector backbone and all other fragments made by  
659 PCR were digested with DpnI to remove template DNA. Transformants were  
660 selected on SC selection media plates lacking histidine [0.17% Bacto-yeast

661 nitrogen base without amino acids (MilliporeSigma, Cat. # Y1251-100G), 0.5%  
662 ammonium sulfate, 2% D-glucose, 0.2% Dropout mix (MilliporeSigma, Cat. #  
663 Y2001-20G), 2% agar, 80 mg/l uracil, 80 mg/l L-tryptophan, and 240 mg/l L-  
664 leucine] at 30°C for 3-4 days. Plasmid DNA were prepared using QIAprep Spin  
665 Miniprep Kit (Qiagen, Cat. # 27104) and screened by restriction enzyme  
666 fingerprinting. Plasmid DNA from selected yeast colonies was introduced into *E.*  
667 *coli* strain DH5 $\alpha$  and isolated plasmid DNA then further validated by additional  
668 restriction enzyme fingerprinting.

669 Below we describe construction of each reporter and intervening spacer  
670 modules and BAC recombineering assembly of these modules to create the 3-  
671 reporter BAC. ApE (M. Wayne Davis, University of Utah,  
672 <http://biologylabs.utah.edu/jorgensen/wayned/ape/>) and SnapGene (from GSL  
673 Biotech; available at [snappgene.com](http://snappgene.com)) programs were used to analyze sequence  
674 data, design primers, and design cloning strategies.

675 **Construction of plasmid pRM01-RSLB1-Spec (Reporter module 01):**

676 Plasmid pRM01 was made by sequential addition of two DHFR homology  
677 regions to plasmid pEGFP-C1 (Clontech). First, the 2.1 kb DHFR homology  
678 region (M1F4) was PCR amplified from the DHFR BAC using primer pair M1F4-  
679 BamHIfor/M1F4-Agelrev, double digested with BamHI/Agel, and ligated with the  
680 BamHI/Agel digested pEGFP-C1 to generate intermediate plasmid pEG-Rep-  
681 Module-1a. Next, the 2.0 kb DHFR homology region (M2F12) was PCR  
682 amplified from the DHFR BAC using primer pair M2F12-AgeIFor/M2F12-PshRev,



683 double digested with *AgeI*/*PshAI* and ligated with the *AgeI*/*SnaBI* digested  
684 plasmid pEG-Rep-Module-1a to produce plasmid pRM01.

685 To create plasmid pRM01-Spec (Reporter recipient module 01), a 1.6 kb  
686 Spectinomycin resistance gene expression cassette (SpecR), derived from  
687 plasmid pYES1L (Thermo Fisher Scientific), was inserted into pRM01, 400 bp  
688 upstream of the 3' end of the M2F12 DHFR homology region by two-fragment  
689 Gibson Assembly (80). The two fragments for Gibson assembly were PCR  
690 amplified from pRM01 using primer pair GA-RM01-Spec-For/ GA-RM01-Spec-  
691 Rev (PCR product size: 7.8 kb), or from pYES1L using primer pair  
692 Specfor/SpecRev (PCR product size: 1.6 kb) respectively.

693 The pRSLB1 (hRPL32-SNAP-Lamin B1) plasmid harboring SNAP-tagged  
694 Lamin B1 reporter expression cassette (RSLB1) was constructed by three-  
695 fragment Gibson assembly. pEGFP-Lamin B1 plasmid vector backbone 5.3 kb  
696 fragment was prepared by *Asel*/*BsrGI* double digestion. The hRPL32 promoter  
697 (2.2 kb) and SNAP tag (561 bp) fragments were PCR amplified using primer  
698 pairs GA-hRPL32-fwd/GA-hRPL32-rev (template plasmid pMOD-HB2-hRPL32-  
699 RZ, made in this study), and GA-SNAP-fwd/GA-SNAP-rev (template plasmid  
700 pSNAPf, New England Biolabs).

701 pRM01-Spec was linearized by *AgeI* and simultaneously  
702 dephosphorylated by Shrimp Alkaline Phosphatase (New England Biolabs, Cat. #  
703 M0371S). The RSLB1 expression cassette was PCR amplified from plasmid  
704 pRSLB1 using primer pair R32CerLBAgelfor/newPCFAgelrev (PCR product size:  
705 4.9 kb) and double digested with *DpnI*/*AgeI*. The linearized pRM01-Spec and the

706 digested RSLB1 PCR product were ligated to produce plasmid pRM01-RSLB1-  
707 Spec, which was digested with AseI to produce the final BAC recombineering  
708 10.3 kb targeting construct.

709 **Construction of plasmid pRM02-PSF-Spec (Reporter module 02):**

710 Plasmid pRM02 was made using similar cloning steps used to produce pRM01  
711 except two different DHFR homology regions were added to pEGFP-C1: 2.0 kb  
712 PCR product M2F4 (primer pair M2F4-BamHIfor/M2F4-AgeIrev) replaced M1F4  
713 and 2.0 kb PCR product M3F1 (primer pair M3F1-AgeIFor/M3F1-PshRev)  
714 replaced M2F12. Plasmid pRM02-Spec was made the same way as pRM01-  
715 Spec except that fragment 1 for Gibson assembly was PCR amplified from  
716 plasmid pRM02 using primer pair GA-RM02-Spec-For/GA-RM02-Spec-Rev  
717 (PCR product size: 7.8 kb). The final plasmid pRM02-Spec (pRep-module 02-  
718 Spec) is Reporter recipient module 02 for the SNAP-tagged Fibrillarin reporter  
719 expression cassette (PSF).

720 To create plasmid pPSF (pPPIA-SNAP-Fibrillarin), the GFP cassette  
721 between KpnI/HpaI restriction sites of plasmid GFP-Fibrillarin was replaced with  
722 a 730 bp Cerulean cassette PCR amplified from plasmid pCerulean-N1 (New  
723 England Biolabs) using primer pair ForCerFib/RevCerFib, resulting in an  
724 intermediate plasmid pPCF. Next, the CMV promoter between SnaBI/HindIII  
725 sites of pPCF was replaced with the 2.8 kb PPIA promoter PCR amplified from  
726 plasmid p[MOD-HB2-PPIA-RZ] (made in this study) using primer pair  
727 PPIACerFibFor/ PPIACerFibRev, resulting in plasmid pPPIA-Cer-Fib. Finally, the  
728 720 bp Cerulean cassette between the AgeI/HpaI sites of pPPIA-Cer-Fib was

729 replaced with a 560 bp SNAP tag fragment PCR amplified from plasmid pSNAPf  
730 (New England Biolabs) using primer pair Snap-XmaI-For/Snap-HpaI-Fib-Rev and  
731 double digested with XmaI/HpaI, producing pPSF.

732 pRM02-Spec was linearized by AgeI and simultaneously  
733 dephosphorylated by Shrimp Alkaline Phosphatase (New England Biolabs, Cat. #  
734 M0371S). The 4.6 kb PSF expression cassette was PCR amplified from pPSF  
735 using primer pair PSF-AgeI-For/ PSF-AgeI-Rev and double digested with  
736 DpnI/AgeI. Their ligation produced plasmid pRM02-PSF-Spec, which provided  
737 the 10.4 kb BAC recombineering targeting construct after BamHI/AatII/RsrII triple  
738 digestion of pRM02-PSF-Spec.

739 **Construction of plasmid pRM03-PCM-Spec (Reporter module 03):**

740 Plasmid pRM03 was made using similar cloning steps used to produce pRM01  
741 except two different DHFR homology regions were added to pEGFP-C1: 2.1 kb  
742 PCR fragment M3F4 (primer pair M3F4-BamHIfor/M3F4-AgeIrev) replaced M1F4  
743 and 2.1 PCR fragment M4F1 (primer pair M4F1-AgeIFor/M4F1-PshRev)  
744 replaced M2F12. Plasmid pRM03-Spec was made the same way as pRM01-  
745 Spec except that fragment 1 for Gibson assembly was PCR amplified from  
746 plasmid pRM03 using using primer pair GA-RM03-Spec-For/ GA-RM03-Spec-  
747 Rev (PCR product size: 7.8 kb). The final plasmid pRM03-Spec (pRep-module  
748 03-Spec) is Reporter recipient module 03 for the mCherry-tagged Magoh reporter  
749 expression cassette (PCM).

750 Plasmid pPCM (pPPIA-mCherry-Magoh) was created in two steps. First,  
751 the CMV promoter between the NdeI/NheI sites of plasmid pmRFP-Magoh was

752 replaced with the PPIA promoter (2.8 kb), PCR amplified from plasmid pMOD-  
753 HB2-PPIA-RZ using primer pair PPIA-Magohfor/ PPIA-MagohRev and double  
754 digested with NdeI/NheI, resulting in intermediate plasmid pPMM. Next, the  
755 mRFP tag between the NheI/HindIII sites of pPMM was replaced with a 720 bp  
756 mCherry tag PCR amplified from plasmid pQCXIN-TetR-mCherry using primer  
757 pair mCherry-NheI-Magoh-For/mCherry-H3-Magoh-Rev, resulting in plasmid  
758 pPCM.

759 To create plasmid pRM03-PCM-Spec (Reporter module 03), plasmid  
760 pRM03-Spec was linearized by AgeI and simultaneously dephosphorylated by  
761 Shrimp Alkaline Phosphatase (New England Biolabs, Cat. # M0371S). A 4.2 kb  
762 PCM expression cassette was PCR amplified from plasmid pPCM using primer  
763 pair MMorCF-AgeIfor/newPCFAgeIrev and double digested with DpnI/AgeI.  
764 pRM03-Spec and the PCM PCR product were ligated, producing plasmid  
765 pRM03-PCM-Spec, which was used as a template for PCR amplification using  
766 primer pair M3F4-PCR-Fw/M4F1-PCR-Rev to produce the 9.9 kb BAC  
767 recombineering target. After PCR, any remaining template plasmid was digested  
768 with DpnI.

769 **Construction of plasmid pRS413-DHFR-Mod-02-Kan (Intervening**  
770 **DHFR module 02):** Plasmid pRS413-DHFR-Mod-02 was made by assembling  
771 the vector backbone with four additional fragments using the DNA assembler  
772 method (81, 82). Fragment 5'-DHM2 (4.3 kb) and fragment 3'-DHM2 (6.3 kb)  
773 with an overlap of 659 bp and were both PCR amplified from the DHFR BAC,  
774 using primer pair M2F12-AgeIfor/M2F1rev or DHM2-Seq2/M2F4-AgeIrev,

775 respectively. Two bridging oligomers, with a 125 bp homology to the pRS413  
776 vector backbone, and a 125 bp homology to fragment 5'-DHM2 (oligo M2F1-  
777 pRS413) or fragment 3'-DHM2 (oligo M2F4-pRS413) were synthesized at  
778 Integrated DNA Technologies, Inc. The final Intervening DHFR module 02,  
779 plasmid pRS413-DHFR-Mod-02-Kan, was created by ligating a 2.4 kb Kan/NeoR  
780 cassette derived from DraI digestion of plasmid pEGFP-C1, with the plasmid  
781 pRS413-DHFR-Module-02 linearized by DraIII and blunted by DNA Polymerase  
782 I, Large (Klenow) Fragment.

783 For BAC recombineering an 11.7 kb of targeting construct was amplified  
784 from plasmid pRS413-DHFR-Mod-02-Kan using primer pair M2F12-  
785 AgeIFor/DH2-4rev and purified by gel extraction after DpnI digestion of the  
786 template plasmid.

787 **Construction of plasmid pRS413-DHFR-Mod-03-Kan (Intervening**  
788 **DHFR module 03):** Plasmid pRS413-DHFR-Mod-03 was made by assembling  
789 the vector backbone with four additional fragments using the yeast DNA  
790 assembler method. Fragment 5'-DHM3 (6.5 kb) and fragment 3'-DHM3 (5.0 kb)  
791 with an overlap of 1553 bp were both PCR amplified from the DHFR BAC using  
792 primer pair M3F1-AgeIFor/M3F3-BamHIrev or M3-F3For/M3F4-AgeIRev,  
793 respectively. Two bridging oligomers, with a 125 bp homology to the pRS413  
794 vector backbone, and a 125 bp homology to fragment 5'-DHM3 (oligo M3F1-  
795 pRS413) or to fragment 3'-DHM3 (oligo M3F4-pRS413), respectively, were  
796 synthesized at Integrated DNA Technologies, Inc. The final Intervening DHFR  
797 module 03, plasmid pRS413-DHFR-Mod-03-Kan, was created by ligating a 2.4

798 kb Kan/NeoR cassette derived from Dral digestion of plasmid pEGFP-C1, with  
799 the plasmid pRS413-DHFR-Mod-03 linearized by SmaI.

800 For BAC recombineering a 12.2 kb targeting construct was amplified from  
801 plasmid pRS413-DHFR-Mod-03-Kan using primer pair DH3-1for/DH3-4rev and  
802 purified by gel extraction after DpnI digestion of the template plasmid.

803 **Construction of plasmid pRS413-DHFR-Mod-04-Zeo (Intervening**  
804 **DHFR module 04):** Plasmid pRS413-DHFR-Mod-04 was made by assembling  
805 the vector backbone plus 5 additional fragments using the yeast DNA assembler  
806 method (4). Fragment 5'-DHM4 (4.9 kb), fragment Mid-DHM4 (5.2 kb) and  
807 fragment 3'-DHM4 (5.2 kb) with an overlap of 2663 bp in between 5'-DHM4 and  
808 Mid-DHM4, and an overlap of 2542 bp in between Mid-DHM4 and 3'-DHM4,  
809 were PCR amplified from the DHFR BAC using primer pair M4F1-  
810 Agelfor/DHM4F2-R, DHM4F2-Fw/DHM4F3-R, or Fw-M4F2-BamHI/RevM4F5-  
811 Mlul, respectively. Two bridging oligomers, with a 125 bp homology to pRS413  
812 vector backbone, and a 125 bp homology to fragment 5'-DHM4 (oligo M4F1-  
813 pRS413), or to fragment 3'-DHM4 (oligo M4F5-pRS413), were synthesized at  
814 Integrated DNA Technologies, Inc. The final Intervening DHFR module 04,  
815 plasmid pRS413-DHFR-Mod-04-Zeo, was created by ligating a 1.1 kb ZeoR  
816 expression cassette PCR amplified from plasmid pSV40/Zeo2 (ThermoFisher  
817 Scientific) using 5' phosphorylated primer pair ZeoMlulFor/ZeoMlulRev, with the  
818 plasmid pRS413-DHFR-Module-04 linearized by BmgBI.

819 For BAC recombineering an 11.6 kb targeting construct was excised out  
820 from plasmid pRS413-DHFR-Mod-04-Zeo using KpnI/DrdI restriction enzymes  
821 and gel purified.

822 **Assembly of modules to create multi-reporter DHFR BAC:** The six  
823 targeting constructs derived from the three reporter modules and the three  
824 intervening DHFR modules were incorporated into the DHFR BAC by BAC  
825 recombineering, with the following order: Reporter module 01, Intervening DHFR  
826 module 02, Reporter module 02, Intervening DHFR module 03, Reporter module  
827 03 and Intervening DHFR module 04. *E. coli* strain SW102 was used for BAC  
828 recombineering. Each round of BAC recombineering used a corresponding  
829 antibiotic (50 µg/ml Kanamycin, 50 µg/ml Spectinomycin, or 25 µg/ml Zeocin) as  
830 positive selection for incorporation of the current targeting construct as described  
831 in section “Construction of dual reporter DHFR BACs”. In the second to the last  
832 round of BAC recombineering, colonies were further screened for loss of the  
833 antibiotic resistance gene incorporated in the previous round of BAC  
834 recombineering by streaking colonies onto a plate containing the corresponding  
835 antibiotic. Each round of recombination was validated by restriction enzyme  
836 fingerprinting.

837

838

## 839 **RESULTS**

### 840 **Overview of BAC TG-EMBED toolkit development:**

841 We previously demonstrated the feasibility of the BAC TG-EMBED  
842 approach using both the DHFR BAC (51) and a BAC containing the human  
843 GAPDH gene locus (GAPDH BAC) (54). We set out to extend this BAC TG-  
844 EMBED methodology in two new directions (Figure 1).

845 First, to better control transgene expression and to be able to express  
846 multiple transgenes at reproducible expression ratios, we explored a set of  
847 constitutive promoters with various strengths for transgene expression. A  
848 previous similar survey of promoters within BAC scaffolds focused only on strong  
849 promoters (53). Moreover this survey compared average expression in pools of  
850 cell colonies containing different copy-number BAC insertions (53). Here we  
851 used a two-reporter, single-cell ratio assay and also examined promoters with a  
852 wide range of promoter strengths. Testing each promoter with each BAC  
853 scaffold would have generated too large a number of possible combinations. We  
854 therefore decided to test a number of different promoters with the original DHFR  
855 BAC.

856 Second, we used one specific reporter gene construct to survey the effect  
857 of different BAC scaffolds on reporter gene expression. Previous similar  
858 applications used BAC scaffolds containing multiple endogenous genes which  
859 would also be expressed in addition to added transgenes (51–53). Moreover, in  
860 a previous, similar application, different strong promoters were tested by insertion  
861 into the exon of an active BAC gene (53). Here we compared BAC scaffolds



862 containing expressed genes with BAC scaffolds from gene deserts or regions  
863 containing silenced genes. We assayed the level, stability, and reproducibility of  
864 the embedded reporter gene expression when inserted into different BAC  
865 scaffolds to identify optimal BAC scaffolds for the BAC TG-EMBED system.

866

867 **A toolset of 7 endogenous promoters for tuning relative transgene**  
868 **expression levels**

869 We selected 7 endogenous promoters to test, either because of their  
870 known ability and use to drive transgene expression in a range of cell types  
871 (EEF1 $\alpha$ , UBC) (60, 84–86), or because these promoters were from  
872 housekeeping genes (RPL32, PPIA, B2M, RPS3A, GUSB) known to be  
873 expressed uniformly across a wide range of tissue types (87–90). We amplified  
874 1-3 kb of regulatory regions upstream of the transcription start sites of these  
875 genes using either human genomic DNA as a template or, for the UBC promoter,  
876 using the pUGG plasmid (54).

877 To assay relative promoter strength, we used the two-minigene reporter  
878 system developed in our previous study in which we compared expression of  
879 CMV-driven EGFP and mRFP minigenes inserted in the same mouse DHFR  
880 BAC scaffold (51). We previously showed that the mRFP minigene reporter  
881 expression varied less than or equal to 2.4-fold when the mRFP reporter was  
882 inserted at 6 different positions ranging 3-80 kb away from the EGFP reporter  
883 gene location on the same BAC (51). To compare relative promoter strengths,  
884 we fixed the insertion positions of mRFP and EGFP, and measured the relative

885 fluorescence levels of mRFP and EGFP when they were both driven by the CMV  
886 promoter versus when the mRFP reporter was driven by an endogenous  
887 promoter (Figure 1). Thus our assay measured the strength of different  
888 endogenous promoters relative to the viral CMV promoter, while also measuring  
889 the variation in this relative strength in different cells of a mixed clonal population.

890 For this assay, the EGFP reporter minigene was inserted 26kb  
891 downstream of the Msh3 transcription start site (51) (Figure 2a). PCR-amplified  
892 promoters from 7 different housekeeping genes were cloned upstream of the  
893 mRFP expression cassette (Figure 2b), and then this mRFP expression cassette  
894 was introduced 121 kb downstream of the Msh3 transcription start site by BAC  
895 recombineering (Figure 2a), generating the dual reporter DHFR BAC. As a  
896 control, we used the dual reporter BAC previously constructed (51) in which the  
897 same mRFP cassette driven by the CMV promoter was inserted at this same  
898 location 121 kb downstream of the Msh3 start site.

899 Mouse NIH 3T3 fibroblasts were then stably transfected with these  
900 modified BAC constructs. After dual selection with G418 and Zeocin for two  
901 weeks, mixed populations of stable clones carrying the BAC transgenes were  
902 analyzed by flow cytometry to measure the relative expression ratio of mRFP and  
903 EGFP (Figure 2c). Fluorescent beads were used as an invariant fluorescence  
904 standard to calibrate the flow cytometer intensity outputs. The ratio of mRFP to  
905 EGFP expression was then normalized by the ratio observed with the original  
906 dual-reporter BAC construct in which both reporters were driven by CMV

907 promoter, providing the endogenous promoter strength relative to the CMV  
908 promoter.

909 We observed an overall variation in promoter strength of over 500-fold,  
910 ranging from the 4-5 fold relative promoter strength of the RPL32 and EEF1 $\alpha$   
911 promoters to the 0.01-fold relative promoter strength for the GUSB promoter as  
912 compared to the CMV promoter (Figure 2d). This expression ratio appeared to be  
913 similar across the cell population.

914

### 915 **Reporter gene expression as a function of transcriptionally active and** 916 **inactive BAC scaffolds**

917 To find the best BAC scaffold for the BAC TG-EMBED system, we tested  
918 BAC scaffolds from both actively transcribed regions and regions containing  
919 silenced genes or no genes. Specifically, we measured the expression as a  
920 function of copy number of one specific reporter gene construct inserted into  
921 these BAC scaffolds. Previous applications of BAC TG-EMBED showed a linear  
922 relationship between copy number and expression level, largely independent of  
923 the chromosome integration site, demonstrating copy-number dependent,  
924 position independent transgene expression (51, 54). For active chromosomal  
925 regions, we chose the RP11-138I1 BAC containing the human ubiquitin B gene  
926 locus (UBB BAC), the RP23-401D9 BAC containing the “safe-haven” mouse  
927 *Rosa26* genetrapp locus (ROSA BAC) (91), and the CITB-057L22 BAC carrying  
928 the mouse Dhfr gene locus (DHFR BAC). For inactive chromosomal regions, we  
929 chose the CTD-2207K13 BAC (2207K13 BAC) that contains no known gene or

930 regulatory element from a gene-desert region from the human genome, and the  
931 CTD-2643I7 (HBB BAC) containing the human HBB gene locus and multiple  
932 olfactory genes, all of which are transcriptionally silenced in fibroblasts (92).

933 We selected the UBC promoter for this reporter gene cassette as this  
934 promoter had previously been shown to drive high expression across multiple cell  
935 types (86); in our dual reporter system the UBC promoter was 2.6-fold stronger  
936 than the CMV promoter (Figure 2d). Moreover, to eliminate any possible  
937 transcriptional interference from closely spaced reporter and selectable marker  
938 minigenes and to minimize any epigenetic silencing arising from DNA  
939 methylation of this reporter gene-selectable marker construct, we used a  
940 commercially available GFP-ZeoR fusion protein gene construct in which all CpG  
941 dinucleotides had been removed and replaced by synonymous codons (Figure  
942 3a).

943 We inserted this UBC-GFP-ZeoR reporter gene construct into different  
944 BAC scaffolds by BAC recombineering, using *galK* for positive/negative selection  
945 (63, 64). To eliminate potential artifacts caused by proximity to active promoters,  
946 transcriptional start sites (TSS), or miRNA sequences, we chose insertion sites  
947 flanked on both sides by at least 5 kb free of such sequence elements (Figure  
948 3b). The UBB, HBB, 2207K13, ROSA, DHFR BACs with the UBC-GFP-ZeoR  
949 reporter gene insertion were named as UBB-UG, HBB-UG, 2207K13-UG, ROSA-  
950 UG and DHFR-UG.

951 After transfection, multiple cell clones (n=20-40) carrying stably integrated  
952 BAC arrays were selected for Zeocin resistance and analyzed for reporter gene

953 expression by flow cytometry, using untransfected NIH 3T3 cells to determine  
954 background, autofluorescence levels. For each cell clone, we used flow  
955 cytometry to measure the mean GFP reporter expression and qPCR to measure  
956 reporter gene copy number. These cell clones showed GFP fluorescence mean  
957 levels ranging from 10-1000 fold higher than the background autofluorescence.

958 Our original working hypothesis predicted that the BAC TG-EMBED  
959 reporter expression should be uniform in all cells of the same clone. Also, we  
960 expected to see a linear relationship between mean reporter gene fluorescence  
961 and number of BAC copies, signifying a copy-number-dependent, position  
962 independent expression. Furthermore, we expected that the slope of this linear  
963 relationship would be higher for BAC scaffolds expected to reconstitute an active  
964 chromatin environment permissive for transgene expression as compared to  
965 BAC scaffolds expected to reconstitute a more condensed, inactive chromatin  
966 environment (Figure 1). In contrast, we expected that the reporter gene cassette  
967 transfected without any BAC scaffold would show clonal expression levels that  
968 poorly correlated with reporter gene copy number (copy-number-independent  
969 expression).

970 Unexpectedly, the stable cell clones we isolated showed two distinct types  
971 of population expression profiles- uniform versus heterogeneous. Uniform clones  
972 showed single, relatively narrow expression peaks in the flow cytometry  
973 histograms, with more than 90% of the cells showing GFP fluorescence varying  
974 only over a 10-fold intensity range (Figure 3c, left). Heterogeneous clones  
975 instead showed two peaks with a range of GFP expression varying ~1000-fold,

976 with the lower GFP intensity peak overlapping with the autofluorescence  
977 distribution of control cells (Figure 3c, right). We had not previously observed  
978 such heterogeneous expression profile using our original DHFR BAC containing  
979 the CMV-driven mRFP alone or both the CMV-driven EGFP and CMV-driven  
980 mRFP reporter genes (51). However, we had observed ~80% uniform clones for  
981 a GAPDH BAC scaffold with the UBC-GFP-ZeoR reporter gene inserted (54).  
982 The percentage of clones showing such heterogeneous expression varied from  
983 58% to 83% for the 5 BAC scaffolds surveyed here (Table 1). No similar  
984 heterogeneous expression profile was observed when the reporter gene  
985 construct was transfected by itself (Table 1).

986 As expected, the control transfection of the reporter gene cassette by itself  
987 resulted in copy-number-independent expression of the reporter gene (Figure 3d,  
988  $R^2=0.09$ ), while the reporter gene embedded within the BACs yielded a linear  
989 relationship between reporter gene fluorescence for both uniform (black) and  
990 heterogeneous (red) BAC transgene clones (Figure 3d,  $R^2=0.561$  to  $0.914$ ).

991 Surprisingly, we observed no more than a 4-fold variation in expression  
992 per copy number among the 5 different BAC scaffolds tested, with no obvious  
993 relationship between the observed slope and the type of BAC scaffold (Figure  
994 3d). Although the transcriptionally active DHFR BAC produced the highest slope,  
995 the transcriptionally inactive HBB BAC and the 2207K13 BAC containing DNA  
996 from a gene desert produced the second and third highest slopes, while the BAC  
997 containing DNA from the “safe haven” mouse *Rosa26* locus produced the lowest  
998 slope.

999 Overall, these results show that for this UBC-GFP-ZeoR reporter gene,  
1000 high-level, copy-number-dependent transgene expression using the BAC TG-  
1001 EMBED method does not require BACs containing active, housekeeping  
1002 genomic regions, but can also be obtained from a wide range of BAC genomic  
1003 DNA inserts, including gene-desert regions. This means BAC TG-EMBED can  
1004 be used to drive expression of only the transgenes added to the BAC scaffold,  
1005 without overexpression of the genes contained within the BAC scaffold.

1006

### 1007 **Temporal stability of BAC-embedded reporter gene expression in uniform** 1008 **cell clones**

1009 We previously showed that the BAC TG-EMBED method provided long-  
1010 term stability of transgene expression in the presence of continued drug selection  
1011 (51). However, in the absence of drug selection we observed a 30-80% drop in  
1012 expression over several months of cell passaging without any apparent drop in  
1013 the integrated BAC copy number (51).

1014 Here we determined the long-term stability of the UBC-GFP-ZeoR reporter  
1015 gene expression for both uniform and heterogeneous clones for four different  
1016 BAC scaffolds. Individual clones for each BAC scaffold (3 uniform and 2  
1017 heterogeneous for ROSA-UG BAC, 7 uniform and 4 heterogeneous for 2207K13-  
1018 UG BAC, 8 uniform and 3 heterogeneous for UBB-UG BAC, and 3 uniform and 3  
1019 heterogeneous for DHFR-UG BAC) were passaged up to three months in the  
1020 absence or presence of drug selection and analyzed for reporter gene  
1021 fluorescence at regular intervals after removal of drug selection.

1022           With the exception of a small number of apparent fluctuations possibly  
1023 related to transient changes in culture conditions, clones with uniform reporter  
1024 gene expression showed no significant change either in the mean fluorescence  
1025 values (Figure 4a) or in the distribution of fluorescence among the same clones  
1026 (Figure 4b and Supplementary Figures S1) over time in the absence of selection  
1027 for all four BAC scaffolds tested. In the presence of continued selection, uniform  
1028 clones containing DHFR-UG or ROSA-UG BACs showed no significant reporter  
1029 gene expression change, while an ~50% or 100% increase was observed for the  
1030 UBB-UG or 2207K13-UG BAC clones, respectively (Figure 4a). No changes in  
1031 estimated BAC copy number based on qPCR measurement were observed for  
1032 any of these clones during this time series. This suggests that epigenetic  
1033 changes driven by selection pressure may be responsible for these small  
1034 increases in reporter gene expression.

1035           Notably, in the absence of selection, heterogeneous clones for all tested  
1036 BAC scaffolds showed a significant and progressive loss of reporter gene  
1037 expression over time. This led to a significant fraction of cells showing  
1038 autofluorescence levels of fluorescence by the end of the experiment (Figure 4a).  
1039 Reporter gene expression-level became progressively more homogenous, but at  
1040 lower fluorescence levels (Figure 4b and Supplementary Figure S1). With  
1041 selection, UBB-UG and DHFR-UG BAC heterogeneous clones showed a 1.6 to  
1042 3-fold increase in reporter gene expression, respectively, while the other BAC  
1043 scaffold heterogeneous clones showed no significant changes (Figure 4a).  
1044



1045 **BAC transgenes are maintained as episomes in heterogeneous clones**

1046 In our previous work, all stable cell clones obtained after BAC transfection  
1047 and drug selection contained single BAC copies or multi-copy BAC arrays that  
1048 had integrated into endogenous chromosomes (51, 65, 93–95) consistent with  
1049 similar results from numerous laboratories. Thus, we initially assumed that the  
1050 broad distribution of reporter gene fluorescence observed in heterogeneous cell  
1051 clones was due to position effect variegation (PEV) of the BAC TG-EMBED  
1052 reporter genes. We hypothesized that integrations into some chromosome  
1053 integration sites led to uniformly-expressing clones, while integration into other  
1054 chromosome sites prone to PEV led to heterogeneous clones with variegated  
1055 transgene expression.

1056 However, the observation of a progressive loss over time of reporter gene  
1057 expression for all heterogeneous clones led us to question the genome stability  
1058 of the BAC transgenes in these clones. To test the relationship between  
1059 changes in reporter gene expression and BAC copy number, we first sorted cells  
1060 from the heterogeneous DHFR-UG-s3 cell clone by fluorescence-activated cell  
1061 sorting (FACS), using a narrow sorting-window centered around the GFP peak  
1062 fluorescence level (Figure 5a). After cell-sorting, with drug selection the original  
1063 heterogeneous reporter gene expression distribution reestablished itself within  
1064 one week of culture (Figure 5b). We then resorted cells showing different levels  
1065 of GFP fluorescence using four narrow fluorescence windows P1, P2, P3, and P4  
1066 (Figure 5b), and then used qPCR to measure the BAC copy number in cells from  
1067 each of these sorting windows. Plotting mean cell fluorescence intensity levels

1068 versus copy number for these clonal subpopulations yielded a strikingly linear  
1069 relationship ( $R^2=0.99$ ) (Figure 5c). Thus, the variable reporter gene expression  
1070 level in this heterogeneous cell clone is the result of loss of BAC transgenes  
1071 rather than chromosome PEV.

1072 To identify the source of this BAC copy-number instability, we next used  
1073 DNA FISH to visualize BAC transgenes within interphase nuclei and mitotic  
1074 chromosome spreads. We compared the distribution of BAC transgenes within  
1075 the heterogeneous clone, DHFR-UG-s3, versus a uniform clone, DHFR-UG-f3-  
1076 15.

1077 DNA FISH suggested that whereas the uniform clone contained cells with  
1078 an integrated DHFR BAC array, the heterogeneous clone contained cells in  
1079 which the DHFR BAC was present as episomes. Specifically, interphase FISH  
1080 against the DHFR BAC in the heterogeneous clone revealed multiple,  
1081 noncontiguous, small spots distributed randomly throughout the nuclei (Figure  
1082 5d). The number of these spots was highly variable in different cell nuclei,  
1083 suggesting unequal segregation of BAC transgenes. In contrast, most cells from  
1084 the uniform clone showed just one large, fiber-like FISH spot per nucleus (Figure  
1085 5e). Moreover, FISH spots in mitotic spreads from the heterogeneous clone  
1086 were either touching or spatially separated from the chromosomes (Figure 5f),  
1087 whereas FISH spots in mitotic spreads from the uniform clone were always  
1088 located within the chromosome (Figure 5g). The number of FISH spots per  
1089 mitotic spread was highly variable in the heterogeneous clone, with each spot  
1090 much smaller than the single FISH spot visualized within the mitotic chromosome

1091 from the uniform clone. Interestingly, the FISH spots in the heterogeneous clone  
1092 mitotic spreads had weak DAPI staining, varying from slightly elevated over  
1093 background to no difference from background (Figure 5h), suggesting these  
1094 structures are much smaller than previously described double minute  
1095 chromosomes (DMs) generated by gene amplification (96–98).

1096 Using DNA FISH of both interphase nuclei and mitotic spreads, we  
1097 confirmed this finding of integrated BACs in all uniformly expressing clones  
1098 versus episomal BACs in all heterogeneously expressing clones in additional cell  
1099 clones carrying BAC transgenes based on three different BAC scaffolds  
1100 (Supplementary Figure S2 and data not shown). Specifically, this includes 4  
1101 heterogeneous and 4 uniform DHFR-UG BAC clones, 3 heterogeneous and 6  
1102 uniform HBB-UG BAC clones, and one heterogenous and 2 uniform COL1A1-UG  
1103 BAC clones.

1104 Unequal segregation of these BAC episomes during cell division would  
1105 explain the heterogeneity of BAC transgene copy number in the cell population of  
1106 heterogeneous clones, leading to variability of reporter gene expression. Indeed,  
1107 telophase cells from heterogeneous clones showed unequal numbers of FISH  
1108 spots in the two daughter nuclei (Figure 5i). In the absence of continued drug  
1109 selection, we would expect cells that have lost BAC transgenes will accumulate if  
1110 there is any selective growth advantage for cells with fewer BAC copies.

1111

1112 **BAC episomes are circular and ~1 Mb in size**

1113 We analyzed the average amount of DNA per BAC episome, using two  
1114 independent methods- light microscopy and pulsed-field gel electrophoresis  
1115 (PFGE). Both methods produced a similar estimate of ~800-1000 kb per BAC  
1116 episome.

1117 Using light microscopy, we measured the average DHFR BAC episome  
1118 DAPI integrated staining intensity in mitotic spreads from cell clone DHFR-UG-s3  
1119 relative to the smallest mouse chromosome (chr19) with known DNA content of  
1120 61.4 Mbp (Figure 6a). This comparison produced an estimated mean episome  
1121 size of 770 kb in this DHFR-UG-s3 clone.

1122 Using PFGE, we observed that the BAC episomes were circular and  
1123 estimated the modal BAC episome size to be ~900 kb and 1 Mbp for DHFR-UG  
1124 and HBB-UG BAC episomes in cell clones DHFR-UG-s3 and HBB-UG-100d3,  
1125 respectively. Two different cell clones, DHFR-UG-f3-1 and HBB-UG-fD2, were  
1126 used as negative controls as they contained the same DHFR-UG or HBB-UG  
1127 BAC DNA as the cell clones with episomes but the BAC DNA was integrated  
1128 within endogenous mouse chromosomes. *E. coli* strains containing the DHFR or  
1129 HBB BACs were used as positive controls for detection of circular episomes.

1130 Pulsed-field gels were analyzed by Southern blotting using pooled BAC  
1131 DNA PCR products as the hybridization probes. Linear but not circular DNAs  
1132 migrate in pulsed-field gels. Similar to the *E. coli* controls containing circular  
1133 BACs, the Southern blot signals for the BAC DNA from the two clones containing  
1134 episomes did not migrate out of the wells (Figure 6b and Supplementary Figure  
1135 S3a-b), consistent with circular rather than linear BAC episomes.

1136 To validate that the BAC episomes are really circular, and to estimate their  
1137 size, the agarose-embedded DNA was digested using the ssDNA specific  
1138 Nuclease S1 prior to PFGE and Southern blot hybridization. After removal of  
1139 proteins, circular DNA episomes in both bacteria and mammalian cells are  
1140 typically negatively supercoiled. This supercoiling generates torsional stress  
1141 which is relieved by local formation of single-stranded regions. Thus, S1  
1142 nuclease has been used to cut these single-stranded regions and linearize  
1143 circular DNA episomes (99–101). After S1 digestion, DNA from the cell clones  
1144 carrying BAC episomes now showed DNA smears with peak intensities of ~900  
1145 kb and 1 Mb for the DHFR-UG-s3 and HBB-UG-100d3 cell lines, respectively  
1146 (Figure 6b and Supplementary Figure S3a-b). In contrast, after S1 nuclease  
1147 digestion, DNA from the integrated BAC clones showed signals within the wells  
1148 and above 2 Mb, overlapping the smears of fragmented genomic DNA (Figure 6b  
1149 and Supplementary Figure S3a-b). DNA of *E. coli* containing DHFR BAC and  
1150 HBB BAC episomes produced bands at ~200-300 kb, in addition to signals in the  
1151 wells (Figure 6b and Supplementary Figure S3a-b) after S1 nuclease digestion.  
1152 These estimated BAC sizes measured slightly larger than the actual BAC sizes  
1153 (~200 kb), indicating there might be a slight overestimation of episome sizes  
1154 using our PFGE running conditions.

1155

### 1156 **BAC episomes contain no detectable host DNA as revealed by CNV analysis**

1157 The propagation of BAC transgenes as episomes was unexpected. A  
1158 major question is whether these episomes consist solely of BAC DNA, or

1159 whether host DNA is also included and possibly required for episome  
1160 propagation.

1161 We first compared the estimated episome DNA content size with  
1162 estimates of BAC copies per episome. BAC episome sizes estimated by either  
1163 light microscopy or PFGE were approximately twice as large as predicted from  
1164 qPCR BAC copy number estimates (Table 2). The estimated average BAC  
1165 content per episome was 445 kb in DHFR-UG-s3 and 716 kb in HBB-UG-100d3.

1166 The difference in the estimated BAC DNA content per episome and the  
1167 average episome size is at most a few hundred kb, and may be accounted for by  
1168 inaccuracies of the qPCR copy number, PFGE size estimation, and possible  
1169 variation in sequence representation within the BAC episomes due to shearing of  
1170 DNA and/or recombination during the transfection and creation of the BAC  
1171 episomes.

1172 Alternatively, this difference in episome size versus qPCR estimation of  
1173 BAC copies per episome could also be caused by presence of host cell genomic  
1174 DNA on the episomes. To search with higher sensitivity for the possible presence  
1175 of host DNA within the episome, we performed Whole Genome Sequencing  
1176 (WGS) based copy number variation (CNV) analysis of the two clones, DHFR-  
1177 UG-s3 and HBB-UG-100d3. Genomic regions present on the episomes would  
1178 appear amplified in cells containing episomes (test sample), comparing to cells  
1179 with no episomes (reference sample). Thus the ratio in the number of reads for a  
1180 given bin between the test sample and the reference sample was calculated. To  
1181 reduce noise, bins were merged into segments based on the  $\log_2(\text{ratio})$ , using a

1182 circular binary segmentation (CBS) algorithm (78, 79). The mean  $\log_2(\text{ratio})$  of  
1183 each segment was used to estimate the CNV of this segment in the test sample  
1184 relative to the reference sample.

1185         Mouse 3T3 cells show genomic instability; therefore we anticipated CNV  
1186 between the parental cell line and individual clones. To reduce false-positives  
1187 derived from CNV between different 3T3 clones, independent of episome  
1188 content, we used cells with low reporter gene fluorescence sorted from the cell  
1189 clone containing the episomal BAC transgenes (region L, Figure 6c-d, and  
1190 Supplementary Figure S4a) as the reference sample. To further reduce false  
1191 positives, we also imposed constraints that copy number increase for true  
1192 positive regions should be reproducible between experimental replicates and  
1193 correlate with episomal copy number. We calculated the estimated CNV in cells  
1194 sorted with high (H2) reporter gene expression, using sorted cells with low (L)  
1195 expression as the reference sample (H2, L, Figure 6c-d, and Supplementary  
1196 Figure S4a). We also compared the estimated CNV in cells sorted with high  
1197 reporter gene expression in an independent experiment (H1, Figure 6c-d, and  
1198 Supplementary Figure S4a) with the estimated CNV from the first experiment. All  
1199 samples were sequenced to  $\sim 2x$  coverage.

1200         We used 3 and 30 kb bin sizes for analysis. To reduce noise, we excluded  
1201 all bins in the test sample with zero reads (5.5% of total bins for 3 kb bin analysis  
1202 and 3.5% for 30 kb bin analysis) plus extreme outlier bins, defined by the lower  
1203 quantile minus 4 times the interquantile distance, with unusually low read count

1204 (~0.5% of total bins for 3 kb bin analysis and 2.5% for 30 kb bin analysis) in the  
1205 test sample before calculating ratios.

1206 As a test of our analysis method, we compared the mean segment  
1207  $\log_2(\text{ratio})$  of the BAC regions in H1 and H2, generated by the above analysis  
1208 method, to the fold increase of BAC regions in H1 and H2 relative to L measured  
1209 by qPCR. As expected, the results from the CNV and qPCR analysis were very  
1210 similar (Supplementary Figure S5).

1211 We were interested in asking whether a specific host DNA element was  
1212 present on each episome copy present within a cell clone. We estimated that on  
1213 average the sorted cells with high reporter gene expression had 15-20 episome  
1214 copies per cell, depending on the cell clone, based on qPCR of BAC DNA  
1215 sequences and the estimated number of BACs per episome (Table 3).

1216 We estimated theoretical minimum copy number increase for episome-  
1217 localizing host DNA (minimum increase) in the H1 and H2, based on BAC copy  
1218 number measured by qPCR, and assuming the NIH 3T3 to be tetraploid and  
1219 each episome to have the same host cell genomic DNA (Table 3). Segments  
1220 with mean  $\log_2(\text{ratio})$  equal to or greater than  $\log_2(\text{minimum increase})$  in both H1  
1221 and H2 samples were selected as candidates for being on the episomes (Figure  
1222 6e).

1223 Interestingly, all candidate segments identified belonged to the BAC  
1224 regions, including the UBC-GFP-ZeoR and the BAC vector (Figure 6f-g,  
1225 Supplementary Figure S4b-c and Supplementary Figure S6), and no other  
1226 mouse genomic sequence satisfied all of the above conditions.



1227           In conclusion, we could not detect host cell DNA reproducibly present on  
1228 all episomal copies using bin sizes of either 3 or 30 kb. We therefore conclude  
1229 BAC DNA itself is sufficient for the creation and propagation of these BAC  
1230 episomes. We cannot exclude the possibilities, however, that an unmappable,  
1231 repetitive host DNA sequence is present on the episomes and confers their  
1232 ability to propagate or that different host DNA sequences are present on each  
1233 episome present within a single cell clone.

1234

1235   **Multiple promoters added to BACs support formation of episomal BAC**  
1236   **transgenes but only in certain cell lines**

1237           Because we did not observe episomal BAC transgenes in our original  
1238 BAC-TG EMBED work using the CMV-mRFP-SV40-ZeoR reporter gene (51), we  
1239 hypothesized that addition of the UBC-GFP-ZeoR reporter gene might be  
1240 responsible for BAC episome formation. Our dual-reporter assay showed that  
1241 the UBC promoter was much stronger than the CMV promoter; therefore, we  
1242 further hypothesized that promoter strength might correlate with the frequency of  
1243 BAC episome formation.

1244           To test this hypothesis, we isolated clones stably transfected with the  
1245 dual-reporter DHFR BAC transgenes and examined reporter gene expression  
1246 patterns in these clones by flow cytometry (Supplementary Figure S7a). As  
1247 expected, no heterogeneously GFP/RFP expressing clones were observed  
1248 when the mRFP reporter gene was driven by CMV promoter (n=13) or B2M  
1249 promoter (n=6). In contrast, we observed ~70% or ~30% heterogeneously

1250 GFP/RFP expressing clones when the mRFP was driven by the EEF1a promoter  
1251 (12/18) or the RPL32 promoter (10/29), respectively (Supplementary Figure S7a-  
1252 b). We confirmed that BAC transgenes in these heterogeneously expressing  
1253 clones were episomal using DNA FISH (Supplementary Figure S7c).

1254         These results using human promoter sequences added to the BACs, did  
1255 show a rough correlation of promoter strength with the frequency of clones  
1256 containing episomes. However, when we examined a series of DHFR BAC  
1257 constructs, we instead observed clones with episomes using BAC transgenes  
1258 containing the dual reporter, selectable marker CMV-mRFP-SV40-ZeoR reporter  
1259 cassette. This included the identical DHFR BAC construct used in our previous  
1260 BAC-TG EMBED work (51), as well as various DHFR BAC deletions  
1261 (Supplementary Figure S8a). All the DHFR BAC constructs contain LacO  
1262 repeats, and a NIH 3T3 derived clone expressing EGFP-LacI was used for  
1263 transfection, so that BAC transgenes could be observed directly in fixed cells.  
1264 Although all clones showed a unimodal flow cytometry expression pattern,  
1265 explaining why we did not observe this phenomenon previously, a large fraction  
1266 (DHFR-c27: 1/2, DHFR-c27d2: 2/10, DHFR-c27d3crz: 2/16, DHFR-c27d4: 7/10)  
1267 of clones showed episomal BAC transgenes (Supplementary Figure S8b-c).

1268         Thus, the promoter used to drive reporter and/or selectable markers  
1269 appears to determine not whether episomal BAC transgenes are established but  
1270 rather whether a unimodal versus bimodal distribution is observed in cells  
1271 containing these episomal BAC transgenes. The presence of strong promoters  
1272 (UBC, EEF1a and RPL32) appears to allow the formation of bimodal distributions

1273 of reporter gene expression, possibly related to the balance between the  
1274 degradation rate of the initially high levels of selectable marker versus the rate of  
1275 loss of BAC transgene episomes during cell division.

1276 Next, we tested whether BACs can form episomes in a different cell line  
1277 other than mouse NIH 3T3 fibroblasts. Previously, we observed cell clones  
1278 containing only integrated BAC transgenes in CHO (93, 95) and mouse ES cells  
1279 (54, 94). Reasoning that cancer cells with some level of genomic instability might  
1280 be more prone to formation of BAC episomes, we tested the human colorectal  
1281 carcinoma epithelial cell line, HCT116, using the 2207K13-UG BAC which  
1282 produced 79% episome clones in NIH 3T3 cells.

1283 Four out of 32 stable clones showed a heterogeneous GFP distribution  
1284 similar to that observed in NIH 3T3 episome clones, with a broad high fluorescent  
1285 peak and a tail/secondary peak near the auto-fluorescence level (Supplementary  
1286 Figure S9). However, none of these four clones showed episomal BAC  
1287 transgenes by DNA FISH (Supplementary Figure S10a). Instead, most cells in  
1288 each clone showed the same number (one or two) of spots, but these spots  
1289 varied in size from cell to cell. Therefore, it appears that the broad GFP peaks in  
1290 these four clones are due to some form of genomic instability leading to CNV of  
1291 integrated transgene arrays. Interestingly, one clone, HCT116-k13\_06, out of the  
1292 32, which had a single GFP peak, showed a small fraction of cells of with  
1293 episomal BAC transgenes, in contrast to the vast majority of cells which  
1294 contained integrated BAC transgenes (Supplementary Figure S10b). One out of  
1295 24 subclones of this HCT116-k13\_06 clone, HCT116-k13\_06-10, showed a

1296 similar mixed population with either integrated BACs or episomal BACs, similar to  
1297 the parent clone HCT116-k13\_06 (Supplementary Figure S10c). The low  
1298 frequency of clones with episomal BACs, the variable size of the integrated BAC  
1299 transgene arrays, and the co-existence of integrated and episomal BAC  
1300 transgenes in the same cells and from the same clone suggests these episomes  
1301 might arise from the well-known phenomenon of gene amplification (96–98).

1302 Similarly, a small percentage of clones carrying the GAPDH BAC in stable  
1303 mouse ES cell colonies showed broad GFP expression peaks by flow cytometry,  
1304 but FISH revealed this was due to variable size, integrated BAC transgene arrays  
1305 (Binhui Zhao, Ph.D thesis), due presumably to some type of CNV induced by  
1306 genomic instability of these transgene arrays.

1307 In conclusion, the high frequency establishment of BAC transgene  
1308 episomes seen in mouse 3T3 cells does not appear to occur in either HCT116 or  
1309 mouse ES cells, or at detectable frequency in CHO cells (54, 93–95).

1310

### 1311 **Expression of multiple-reporters by BAC-MAGIC**

1312 As a proof-of-principle application of our improved toolkit for BAC TG-  
1313 EMBED, we created a multi-transgene BAC to label simultaneously the nuclear  
1314 lamina, nucleoli, and nuclear speckles with a single stable transfection. The  
1315 original DHFR BAC was used for this multi-transgene expression. A SNAP-  
1316 tagged Lamin B1 reporter mini-gene was used to label the nuclear lamina, a  
1317 SNAP-tagged Fibrillarin the nucleoli, and an mCherry-Magoh the nuclear  
1318 speckles. We used the RPL32 promoter to drive the expression of the SNAP-

1319 tagged Lamin B1, and a promoter of intermediate strength, PPIA, for the SNAP-  
1320 tagged Fibrillarin and the mCherry-tagged Magoh, which are both abundant  
1321 proteins.

1322           Previously, we used random Tn5 transposition to introduce expression  
1323 cassettes into BAC scaffolds (50), but this approach is limited in the number of  
1324 serial insertions that can be made due to the remobilization of existing  
1325 transposons, its requirement for multiple selectable markers, and the  
1326 randomness of the insertion sites. Alternatively, BAC recombineering using  
1327 antibiotic resistance genes as positive selectable markers have been used to  
1328 insert expression cassettes into precise locations on the BACs. However, like  
1329 transposition, this method relies on the availability of multiple selectable markers  
1330 and introduces unwanted selectable markers into the BACs. An alternative BAC  
1331 recombineering scheme using cycles of *galk*-based positive selection to insert  
1332 sequences followed by negative selection to remove *galk* have been used to  
1333 make multiple BAC modifications without addition of unwanted selectable  
1334 markers. However, the low efficiency of negative selection, due to a high  
1335 background of competing, spontaneous deletions of mammalian DNA with its  
1336 high repetitive DNA content, makes this approach quite time and labor intensive.  
1337 Typically, one month is required for each cycle of insertion of DNA by positive  
1338 selection, removal of the selectable marker by negative selection, and  
1339 subsequent screening and testing of DNA from colonies that survive the negative  
1340 selection to identify the small fraction of colonies containing the desired  
1341 homology-driven, specific deletion of just the selectable marker.

1342 To accelerate creation of BACs containing multiple transgene, we created  
1343 a new BAC assembly approach, BAC MAGIC (**BAC-M**odular **A**ssembly of  
1344 **G**enomic loci **I**nterspersed **C**assettes). BAC MAGIC combines the DNA  
1345 assembler method in yeast (81, 82) and/or Gibson assembly (80) with traditional  
1346 cloning methods to create a number of BAC recombination modules followed by  
1347 sequential rounds of BAC recombineering in which one fragment is inserted  
1348 using one selectable marker followed by addition of a new fragment overlapping  
1349 the previous fragment using a second positive selectable marker which replaces  
1350 the first (102). Each round of fragment insertion only requires ~ 1 week for  
1351 transformation and screening of clones. In this way, 45 kb of the DHFR BAC  
1352 was effectively reconstructed such that DHFR sequences remained but 3  
1353 fluorescent mini-gene expression cassettes were added, each spaced by ~10 kb  
1354 of DHFR sequence (Figure 7a-b, Supplementary Figure S11). The large  
1355 homologous sequences flanking each expression cassette reduces  
1356 recombination between similar sequences in other expression cassettes already  
1357 inserted into the BAC, increasing the efficiency of this overall approach.

1358 We began the process using a DHFR BAC. After six rounds of BAC  
1359 recombineering, we had created a BAC with four expression cassettes (Figure  
1360 7b): a SNAP-tagged Lamin B1 minigene, a SNAP-tagged Fibrillarin minigene, a  
1361 mCherry-Magoh minigene, and a ZeoR selectable marker.

1362 We tested simultaneous expression of the three reporters in 17  
1363 independent NIH 3T3 cell clones transfected with the multi-reporter BAC by  
1364 examining fluorescence in fixed cells under a microscope (SNAP-tagged proteins

1365 were labeled with a Fluorescein conjugated SNAP tag substrate before fixation).  
1366 We observed uniform expression of all the three reporters in 16/17 clones. The  
1367 loss of SNAP-Lamin B1 expression in one of the clone (Cl#16) may be due to  
1368 random breakage of the BAC during transfection, as PCR revealed the absence  
1369 of this minigene from the cell clone. Similarly, 12/14 U2OS human osteosarcoma  
1370 cell clones showed both SNAP-Lamin B1 and SNAP-Fibrillarin expression after  
1371 transfection of a BAC containing only these two expression cassettes (data not  
1372 shown).

1373           Within individual cells, a linear correlation was observed between the  
1374 integrated fluorescence intensity per cell of SNAP-tagged proteins Lamin B1 and  
1375 Fibrillarin versus mCherry-Magoh in 4/4 representative NIH 3T3 clones (04, 08,  
1376 13 and 14, Figure 7c). Moreover, these fluorescently tagged proteins showed  
1377 uniform rather than variegating expression in different cell nuclei of the same  
1378 clone observed under the microscope (Figure 7d).

1379

## 1380 **DISCUSSION**

1381 We previously demonstrated the utility of the BAC TG-EMBED method to  
1382 achieve position-independent, copy-number-dependent, one-step transgene  
1383 expression in mammalian cells (51, 54). Here, we have extended the BAC TG-  
1384 EMBED methodology through four new advances and provided a proof-of-  
1385 principle demonstration of this new methodology by efficiently creating cell lines  
1386 stably expressing uniform levels of three different fluorescently tagged proteins-  
1387 Lamin B1, Fibrillarin, and Magoh in a single stable transfection.

1388 First, we describe a toolkit of endogenous promoters providing an ~500-  
1389 fold range in promoter strength varying from ~5 fold higher to ~100-fold weaker  
1390 than the commonly used viral CMV promoter. As these promoters are from  
1391 human genes shown to be expressed in a wide range of cell lines and tissues  
1392 (60, 84–90), we expect them to support transgene expression in most cell types  
1393 and independent of cell proliferation or differentiation state. While most of the  
1394 previous studies on transgene promoters focused on conventional, strong  
1395 promoters (53, 57–60), including a similar approach that expressed mini-genes  
1396 within BAC scaffold (53), we included moderate-strength and weak promoters in  
1397 our survey. The weak promoters we identified, such as GUSB and RPS3A,  
1398 could possibly replace the commonly used minimal promoters or inducible  
1399 promoters where a sustained low-level of transgene expression is needed.  
1400 Moreover, this wide range of promoter strengths allows reproducible expression  
1401 of multiple transgenes over a wide range of relative expression levels from a  
1402 single BAC scaffold, lending itself to such purposes, for example, as the design



1403 of synthetic gene circuits, which typically requires expression of different  
1404 components at reproducible relative expression levels (25).

1405         Second, we show that with the UBC-GFP-ZeoR reporter gene, our BAC-  
1406 TG EMBED system achieved stable reporter gene expression of integrated BAC  
1407 transgenes for several months in the absence of drug selection. This is an  
1408 improvement over the 30-80% drop in expression observed originally with the  
1409 CMV-mRFP-SV40-ZeoR reporter gene (51). Both the UBC promoter and the  
1410 CpG free GFP-ZeoR gene body could be contributing to this improvement.

1411         Third, we show that at least with the UBC-GFP-ZeoR expression cassette,  
1412 our BAC TG-EMBED system is not dependent on BAC scaffolds containing  
1413 active DNA genomic regions but also works with BAC scaffolds containing  
1414 silenced DNA genomic regions as well as gene deserts. UBC may represent a  
1415 member of a class of active, house-keeping gene promoters that is relatively  
1416 insensitive to chromosome position effects. This allows choice of a BAC scaffold  
1417 for the BAC TG-EMBED method that will not co-express any genes other than  
1418 the introduced transgene cassettes. In contrast, both our previous BAC TG-  
1419 EMBED studies (51, 54) and similar work from other laboratories (52, 53), used  
1420 only BACs containing highly-transcribed house-keeping genes, due to the  
1421 assumption that either an active chromatin region or active 5' *cis*-regulatory  
1422 regions would be required for creating a transcriptionally permissive environment  
1423 for transgene expression. Integration of the UBC-GFP-ZeoR reporter gene into  
1424 the BAC was required for position-independent, copy-number dependent  
1425 expression, as its expression was copy-number independent when the same

1426 UBC-GFP-ZeoR reporter gene was stably transfected by itself into cells. The  
1427 expression levels of this UBC-GFP-ZeoR were similar, per copy number, in cell  
1428 clones with episomal BAC transgenes to levels in clones with integrated BACs.

1429 Fourth, we describe an episome version of our BAC-TG EMBED system.  
1430 In a single experiment, clones containing either stably integrated or  
1431 extrachromosomally maintained BAC transgenes can be isolated. Most of the  
1432 widely used episomal vectors are either based on viral sequences or derived  
1433 from the non-viral pEPI plasmid (38–41). A notable feature of the episomes  
1434 generated by our BAC TG-EMBED system is that they are lost rapidly in the  
1435 absence of drug selection, whereas both of the other two systems show  
1436 selection-independent mechanisms for stable episome maintenance (43–47,  
1437 103). While episome stability is valuable for certain applications, in other cases  
1438 one would like to be able to easily eliminate the episomes as needed. Moreover,  
1439 in contrast to the low copy number of episomes per cell produced using the other  
1440 two methods, the BAC TG-EMBED method yields tens of BAC copies per cell  
1441 allowing for much higher transgene expression levels. Additionally, the sizes of  
1442 the episomes generated by the BAC TG-EMBED method are much larger than  
1443 those generated by the other two methods. In the two clones we examined, the  
1444 episomes were ~1 Mb and containing several copies of the BACs per episome  
1445 and no detectable host DNA.

1446 The high frequency creation and simple composition of these BAC  
1447 episomes contrasts with human artificial chromosomes (HACs), which are  
1448 special episomes, usually 1-10 Mb in size containing centromeric repeat

1449 sequences, mitotically stable, and maintained at low copy number (104–107).  
1450 Capable of introducing large DNA sequences into recipient cells, HACs have  
1451 shown great potential in a wide range of applications, such as recombinant  
1452 protein production, drug selection and gene therapy (108–111). However, the  
1453 construction of HACs remains non-trivial: it requires cloning of either telomere  
1454 sequences and/or alphoid DNA, the formation of HACs occurs at very low  
1455 frequency and only in certain cell lines (112), and the transfer of HACs from  
1456 donor cells into recipient cells is difficult (113, 114). Moreover, the presence of  
1457 large telomere sequences and/or alphoid DNA on the HACs, and the  
1458 heterchromatic state associated with these repeats, increases the likelihood of  
1459 transgene silencing.

1460         In contrast, with our BAC-TG EMBED system, 10s-100s of stable cell  
1461 clones containing multiple copies of ~Mb-size episomes, likely containing only  
1462 BAC DNA, can be obtained from a single transfection. Cells containing high  
1463 copy numbers of these BAC episomes can be enriched by flow sorting, while  
1464 cells from these clones containing no BAC episomes can be recovered after  
1465 removal of drug selection and/or flow sorting. We anticipate that with additional  
1466 engineering, these BAC episomes might possibly become a high-capacity  
1467 episome system complementary to HACs, assuming they can be isolated from  
1468 one cell line and then introduced and propagated in other cell lines.

1469         It remains unclear how these BAC episomes form in NIH 3T3 cells and  
1470 why they do not do so in other cell lines. In the two clones we studied, the  
1471 episomes were circular DNA and composed of several BAC copies.

1472 Interestingly, previous studies have shown that plasmids containing a MAR that  
1473 is also a replication initiation region (IR) could initiate gene amplification in certain  
1474 primary cancer cells, forming homogenously staining regions (HSRs), integrating  
1475 into existing double minutes (DMs) or forming DMs *de novo* in cells without DMs  
1476 (115, 116). It is believed that the IR/MAR plasmids are initially replicated as  
1477 extrachromosomal circles, and then they multimerize into larger circular  
1478 molecules. These amplified circles further multimerize to form DMs, recombine  
1479 with pre-existing DMs or integrate into chromosomes and initiate HSR formation  
1480 (117, 118). This model is very similar to the episome model of gene  
1481 amplification, where instead of the IR/MAR plasmids, small extrachromosomal  
1482 circular DNAs, which are several hundred kb in size and are possibly produced  
1483 by small chromosome deletions, initiates DM and HSR formation (97, 98, 119).

1484         Given that both the MAR and IR sequences are ubiquitous in the  
1485 mammalian genome, it is likely that the BACs used in this study also contain  
1486 MAR and/or IR sequences. However, unlike the MAR/IR plasmids, these BACs  
1487 did not generate typical HSRs when integrated into the chromosomes, and the  
1488 episomes were much smaller than DMs in NIH 3T3 cells. One possible  
1489 explanation is that the BACs undergo initial steps of gene amplification to form  
1490 the episomes in NIH 3T3 cells, but the cells have mechanisms to stop the  
1491 episomes from further multimerization or amplification. As gene amplification  
1492 happens only in cancer cells, perhaps BACs can only form episomes in certain  
1493 cell lines. As shown here, BAC transgene formed episomes in a small fraction of  
1494 HCT116 cells, which could not be stably maintained even with drug selection.

1495 Further study of this BAC episome phenomenon may provide new insights into  
1496 the process of gene amplification.

1497 Alternatively, the formation of BAC transgene episomes in NIH 3T3 cells  
1498 might occur through a process completely unrelated to gene amplification.  
1499 Future work will be needed to determine the actual mechanism of this BAC  
1500 episomal formation in mouse 3T3 cells.

1501 To facilitate the assembly of BACs expressing multiple mini-genes, we  
1502 developed BAC-MAGIC, allowing creation of a multi-transgene expressing BAC  
1503 in several weeks, rather than the 4-5 months which would have been required by  
1504 multiple rounds of DNA insertion using conventional BAC recombineering. Initial  
1505 attempts to reassemble large, ~50kb regions of DHFR using yeast DNA  
1506 assembly failed, apparently due to recombination between repetitive elements  
1507 within the DHFR BAC sequence as well as the expression cassettes. In contrast,  
1508 assembly of 10-15 kb modules from several DNA fragments using yeast DNA  
1509 assembly worked with high efficiency. BAC-MAGIC exploits Gibson and yeast  
1510 DNA assembly to build smaller modules with efficient serial BAC recombineering  
1511 to reconstruct large BAC constructs containing multiple mini-gene expression  
1512 cassettes. More generally, BAC-MAGIC should provide a tool for reconstruction  
1513 of large eukaryotic DNA sequences containing high numbers of repetitive  
1514 elements.

1515 Finally, as a demonstration of our new version of BAC TG-EMBED  
1516 system, we created cell lines expressing three different fluorescently tagged  
1517 proteins in a single stable transfection step requiring just several weeks to isolate

1518 and expand cell clones. Most cell clones expressed all three tagged proteins at  
1519 uniform levels and at reproducible relative levels of expression. This contrasts  
1520 with the 6-12 months we have devoted in previous studies to create similar cell  
1521 lines expressing multiple tagged proteins (120) through a series of individual  
1522 transfections followed by extensive screening of colonies to identify the small  
1523 fraction expressing suitable levels of tagged proteins with minimal variegation  
1524 and/or progressive long-term transgene silencing over time.

1525 We anticipate that our expanded BAC TG-EMBED toolkit similarly will  
1526 facilitate a wide range of applications requiring simultaneous expression of  
1527 multiple transgenes.

1528

1529 **Figure Legends**

1530 **Figure 1. Two-prong experimental approach.** Left: Identification of promoters  
1531 of different strengths- We measured relative promoter strengths by embedding  
1532 EGFP and mRFP reporter genes into the DHFR BAC, using the CMV promoter  
1533 to drive EGFP expression and the test promoter to drive mRFP. The ratio of  
1534 mRFP and GFP expression, normalized by this same ratio for a CMV test  
1535 promoter, defines promoter strength relative to CMV. Right: Surveying reporter  
1536 gene expression in different BAC scaffolds- (Top) The UBC-GFP-ZeoR reporter  
1537 gene was inserted into BACs carrying DNA from mouse or human genomic  
1538 regions corresponding to either transcriptionally active or inactive genomic  
1539 regions. (Bottom) Plotting reporter gene expression (y-axis) versus reporter gene  
1540 copy number (x-axis) for multiple cell clones stably expressing BAC transgenes:  
1541 a linear correlation would indicate copy-number dependent, position independent  
1542 expression, while the slope of this linear correlation would measure reporter gene  
1543 expression per copy number.

1544

1545 **Figure 2. Dual-reporter assay for promoter strength estimation.** (a) Dual  
1546 reporter DHFR BAC showing the two genes on the BAC, *Dhfr* and *Msh3*, and the  
1547 insertion sites of the two reporter expression cassettes. Longer vertical bars-  
1548 exons; shorter vertical bars- UTRs; arrows- direction of transcription; green  
1549 arrowhead- EGFP expression cassette insertion site; red arrowhead- mRFP  
1550 expression cassette insertion site. (b) The two reporter gene/selectable marker  
1551 cassettes used in the assay. The EGFP cassette (top) contains an EGFP

1552 minigene, driven by a CMV promoter, and a Kanamycin/Neomycin resistance  
1553 gene (Kan/NeoR), driven by a SV40 promoter for expression in mammalian cells,  
1554 or by a AmpR promoter for expression in bacteria. The mRFP cassette (bottom)  
1555 contains a mRFP minigene and a Zeocin resistance gene (ZeoR). Different  
1556 endogenous promoters were inserted immediately upstream of mRFP. ZeoR is  
1557 driven by a SV40 promoter for expression in mammalian cells, or by a AmpR  
1558 promoter for expression in bacteria. pA- poly(A) signal. (c) Scatter plots showing  
1559 mRFP fluorescence (y-axis) vs EGFP fluorescence (x-axis) of cells from the  
1560 mixed clonal populations stably transfected with dual reporter DHFR BACs.  
1561 Promoters driving the mRFP and the ratio of mRFP/EGFP (promoter strength)  
1562 are labeled in each plot. (d) Promoter strengths relative to CMV.

1563

1564 **Figure 3. Expression of reporter gene embedded in different BAC**  
1565 **scaffolds.** (a) UBC-GFP-ZeoR-FRT-GalK-FRT cassette showing the GFP-ZeoR  
1566 minigene driven by the UBC promoter and the *galK* positive/negative selection  
1567 marker flanked by 34 bp flippase recognition target (FRT) sites (arrowheads). (b)  
1568 Maps of the BACs used in the study. Longer vertical bars- exons; shorter vertical  
1569 bars- UTRs; black arrows or arrowheads- direction of transcription; green arrow  
1570 heads- UBC-GFP-ZeoR insertion site. (c) GFP fluorescence histograms obtained  
1571 by flow-cytometry for “uniform” (left, green, clone DHFR-UG-f3-15) versus  
1572 “heterogeneous” (right, green, clone DHFR-UG-f1-6) expressing NIH 3T3 clones  
1573 carrying the DHFR-UG BAC. x-axis- fluorescence value, y-axis- cell number;  
1574 gray- autofluorescence of untransfected cells. Fluorescence is measured in



1575 arbitrary units. (d) Scatter plots of mean normalized cellular GFP fluorescence  
1576 (y-axis) vs reporter gene copy number (x-axis) for clonal populations transfected  
1577 with the UBC-GFP-ZeoR cassette alone or with different BAC scaffolds carrying  
1578 the UBC-GFP-ZeoR reporter gene. Linear regression fits (black lines, y-  
1579 intercepts set to 0) are shown with corresponding R-squared values and  
1580 equations. Red circles- heterogeneous clones; Black circles- uniform clones;  
1581 Bottom right of plots: Number of clones analyzed.

1582

1583 **Figure 4. UBC-GFP-ZeoR reporter gene expression over time.** “Uniform”  
1584 clones show stable expression with or without expression, while “heterogeneous”  
1585 clones show progressive loss of expression without selection. (a) Changes in  
1586 GFP fluorescence of uniform versus heterogeneous clones, averaged over  
1587 multiple clones (2-8), carrying indicated BAC transgenes during 96 days of  
1588 continuous passaging with or without Zeocin selection. x-axis- number of days  
1589 since removal of Zeocin; y-axis- mean fluorescence values of multiple clones  
1590 divided by that at day zero; black- “uniform” expressing clones cultured with  
1591 Zeocin; blue- “uniform” expressing clones cultured without Zeocin; red-  
1592 “heterogeneous” expressing clones cultured with Zeocin; green-  
1593 “heterogeneous” expressing clones cultured without Zeocin; (b) GFP  
1594 fluorescence histogram of representative “uniform” and “heterogeneous”  
1595 expressing NIH 3T3 clones at day 0, 24, 60 and 96 without selection. Gray-  
1596 autofluorescence of untransfected cells; Green- GFP fluorescence of the  
1597 indicated clones. x-axis- fluorescence; y-axis- cell number.

1598

1599 **Figure 5. BAC transgenes exist as episomes in heterogeneously**  
1600 **expressing clones.** (a-c) BAC copy number analysis of sub-populations of a  
1601 heterogeneous clone, DHFR-UG-s3, with different fluorescence levels. (a) GFP  
1602 fluorescence histogram of DHFR-UG-s3 cells during first sorting (y-axis- cell  
1603 number; x-axis- GFP fluorescence level). Cells within a narrow peak-window  
1604 (dotted lines) were sorted by FACS. (b) GFP fluorescence histogram of sorted  
1605 DHFR-UG-s3 cells after one week of cell growth. Cells within the four colored  
1606 windows (P1-4) were sorted by FACS and used for BAC copy number estimation  
1607 by qPCR. (c) Mean GFP fluorescence (y-axis) vs copy number (x-axis) of the  
1608 four cell sub-populations and the original unsorted population shows linear  
1609 correlation between fluorescence levels and copy number ( $R^2=0.99$ ). (d-e) DNA  
1610 FISH over interphase nuclei of the heterogeneous clone DHFR-UG-s3 (d) and a  
1611 uniform clone DHFR-UG-f3-15 (e) to visualize the BAC transgenes. Maximum-  
1612 intensity projections are shown. Gamma=0.5 was applied to FISH channel after  
1613 projection to better display low intensity FISH spots. (f-g) DNA FISH over mitotic  
1614 spreads of the heterogeneous clone DHFR-UG-s3 (f) and the uniform clone  
1615 DHFR-UG-f3-15 (g). (h) DAPI intensity over an episome with strong FISH signal  
1616 and one with weak FISH signal. Top: enlarged view of the white square area in  
1617 (f); bottom: DAPI (red) and FISH signal (green) intensity profile along the white  
1618 arrow in the top panel. (i) A pair of telophase nuclei of the heterogeneous clone,  
1619 DHFR-UG-s3, showing unequal segregation of episomal BAC transgenes during  
1620 mitosis. (d-i) Red- DNA DAPI stain; green- BAC FISH signal. Scale bars = 5  $\mu$ m.

1621

1622 **Figure 6. BAC episome size estimation and CNV analysis.** (a) Estimation of  
1623 average episome size in the DHFR-UG-s3 clone using mitotic FISH. Red- DNA  
1624 DAPI stain; Green- BAC FISH signal; Red circles: regions of interest (ROIs) of  
1625 FISH spots used for analysis; Yellow circles: ROI of the smallest chromosome in  
1626 the field. Scale bars = 5  $\mu\text{m}$ . This panel reuses the image in Figure 5f for  
1627 analysis. (b) Southern hybridization using probes prepared from the DHFR BAC  
1628 of cellular DNA without enzyme digestion, or digested with increasing amount of  
1629 S1 Nuclease, separated by PFGE. Lane 1-4: uniform clone DHFR-UG-f3-1;  
1630 Lane 5-8: heterogeneous clone DHFR-UG-s3; Lane 9-12: *E. coli* carrying the  
1631 DHFR BAC. (c-g) CNV analysis of the DHFR-UG-s3 clone. (c) Flow chart of the  
1632 CNV analysis. (d) Two FACS experiments for collecting cells with high (H1 and  
1633 H2), and low (L) fluorescence subpopulation. x-axis- FITC channel intensity; y-  
1634 axis- forward scatter; H1, H2, and L- sorting windows. (e) Episome-localizing  
1635 genomic regions (pink highlighted regions) are expected to have mean  $\log_2(\text{ratio})$   
1636 (red line) equal to or greater than  $\log_2(\text{estimated minimum copy number}$   
1637  $\text{increase})$  (blue dashed line). (f)  $\log_2(\text{ratio})$  of individual bins (dark gray dots) and  
1638 the segment mean  $\log_2(\text{ratio})$  (red lines) around the *Dhfr-Msh3* locus belonging to  
1639 the DHFR BAC (pink highlight) in the H1 and H2 subpopulations of the DHFR-  
1640 UG-s3 clone. (g) Scatter plot of segment mean  $\log_2(\text{ratio})$  vs segment mean  
1641  $\log_2(\text{normalized reads})$  of all segments of the H1 and H2 subpopulations of the  
1642 DHFR-UG-s3 clone. Pink dots- segments belonging to the DHFR BAC, including  
1643 the *Dhfr-Msh3* locus, UBC-GFP-ZeoR and the BAC vector; Black dots- remaining

1644 segments in the genome. (f-g) Blue dashed line:  $\log_2$ (estimated minimum copy  
1645 number increase).  
1646  
1647 **Figure 7. BAC-MAGIC and simultaneous multi-reporter expression.** (a-b)  
1648 Construction of the multi-reporter DHFR BAC by BAC-MAGIC. (a) Modular  
1649 design of BAC-MAGIC. Reporter module 01, 02 and 03 contain reporter gene  
1650 expression cassettes (X), DHFR BAC homologous sequences (dark gray), and  
1651 Spectinomycin resistance markers (SpecR, yellow) near the 3' ends for bacterial  
1652 selection. Intervening DHFR module 02, 03 and 04 contain DHFR BAC  
1653 homologous sequences (dark gray), and antibiotic resistance markers near the 3'  
1654 ends (Kanamycin/Neomycin resistance marker (Kan/NeoR, blue) in module 02  
1655 and 03 for bacterial selection, and Zeocin resistance marker (ZeoR, dark green)  
1656 in module 04 for dual selection in bacterial or mammalian cells). The dotted lines  
1657 mark homologous regions between the reporter modules and the intervening  
1658 DHFR modules. (b) Six sequential steps of BAC recombineering introduce three  
1659 reporter expression cassettes, RPL32-driven SNAP-tagged Lamin B1 (RSLB1),  
1660 PPIA-driven SNAP-tagged Fibrillarin (PSF), and PPIA-driven mCherry-Magoh,  
1661 onto the DHFR BAC (light gray) with ~10 kb of intervening DHFR BAC  
1662 sequences (dark gray). Homologous regions are indicated by crossed lines. (c)  
1663 Relative expression of the SNAP-tagged Lamin B1 and Fibrillarin to the mCherry-  
1664 Magoh reporter in four representative NIH 3T3 cell clones (04, 08, 13 and 14)  
1665 containing the multi-reporter BAC. Integrated fluorescence intensities per cell of  
1666 SNAP--fluorescein (y-axis) and mCherry-Magoh (x-axis) are plotted. Linear

1667 regression lines (y-intercepts set to 0) are shown with corresponding R-squared  
1668 values. Number of nuclei of each clone analyzed range from 18 to 27. Red-  
1669 Clone 04; Blue- Clone 08, Black- Clone 13; Green- Clone 14. (d) Representative  
1670 images (maximum intensity projections of 2-3 optical sections) from the four cell  
1671 clones (Clone 04, 08, 13 and 14) showing expression of the three reporter genes.  
1672 Nuclear lamina is labeled with SNAP-tagged Lamin B1 (green), nucleoli with  
1673 SNAP-tagged Fibrillarin (green), and speckles with mCherry-Magoh (red). One  
1674 magnified nucleus from each representative field (top panel) is shown in the  
1675 bottom panel. Scale bars = 5  $\mu$ m.

1676

1677

1678

1679 **Table 1.** Percentage of heterogeneously expressing clones transfected with the  
1680 UBC-GFP-ZeoR cassette alone or with different BAC scaffolds carrying the UBC-  
1681 GFP-ZeoR reporter gene.

1682

1683 **Table 2.** BAC copy number, episome copy number, and BAC DNA content per  
1684 episome in clone DHFR-UG-s3 and clone HBB-UG-100d3.

1685

1686 **Table 3.** BAC copy number, estimated episome copy number, and estimated  
1687 minimum copy number increase of episome-localizing DNA in H1 and H2  
1688 subpopulations relative to L subpopulation of clone DHFR-UG-s3 and clone HBB-  
1689 UG-100d3.

1690

1691

1692 **FUNDING**

1693 This work was supported by the National Institute of General Medical Sciences  
1694 [GM098319 to A.S.B. and in part GM58460 to A.S.B]. The content is solely the  
1695 responsibility of the authors and does not necessarily represent the official views  
1696 of the National Institute of General Medical Sciences or the National Institutes of  
1697 Health.

1698

1699

1700 **ACKNOWLEDGEMENTS**

1701 We thank Edith Heard (Curie Institute) for providing DHFR BAC (clone  
1702 057L22 from CITB mouse library), Veena K Parnaik (CSIR-CCMB, Hyderabad,  
1703 India) for GFP-Lamin B1 plasmid, Miroslav Dundr (Rosalind Franklin University of  
1704 Medicine and Science) for GFP-Fibrillarin plasmid, Huimin Zhao (University of  
1705 Illinois Urbana-Champaign) for pQCXIN-TetR-mCherry plasmid, Peter Adams  
1706 (Sanford Burnham Prebys Medical Discovery Institute) for BJ-hTERT cells, and  
1707 KV Prasanth (University of Illinois Urbana-Champaign) for mRFP-Magoh  
1708 plasmid. Use of the BD FACS Ariall was assisted by the flow cytometry facility  
1709 stuff at Roy J. Carver Biotechnology Center, University of Illinois at Urbana-  
1710 Champaign (UIUC).

1711

1712

1713 **REFERENCES**

- 1714 1. Walsh,G. (2018) Biopharmaceutical benchmarks 2018. *Nat. Biotechnol.*, **36**,  
1715 1136–1145.
- 1716 2. Prelich,G. (2012) Gene overexpression: uses, mechanisms, and interpretation.  
1717 *Genetics*, **190**, 841–54.
- 1718 3. Glover,D.J., Lipps,H.J. and Jans,D.A. (2005) Towards safe, non-viral  
1719 therapeutic gene expression in humans. *Nat. Rev. Genet.*, **6**, 299–310.
- 1720 4. Zhu,J. (2012) Mammalian cell protein expression for biopharmaceutical  
1721 production. *Biotechnol. Adv.*, **30**, 1158–1170.
- 1722 5. Wurm,F.M. (2004) Production of recombinant protein therapeutics in cultivated  
1723 mammalian cells. *Nat. Biotechnol.*, **22**, 1393–8.
- 1724 6. Rizzo,M.A., Davidson,M.W. and Piston,D.W. (2009) Fluorescent Protein  
1725 Tracking and Detection: Applications Using Fluorescent Proteins in Living  
1726 Cells. *Cold Spring Harb. Protoc.*, **2009**, pdb.top64-pdb.top64.
- 1727 7. Takahashi,K. and Yamanaka,S. (2006) Induction of Pluripotent Stem Cells  
1728 from Mouse Embryonic and Adult Fibroblast Cultures by Defined Factors.  
1729 *Cell*, **126**, 663–676.
- 1730 8. Machida,K., Masutani,M., Kobayashi,T., Mikami,S. and Nishino,Y. (2012)  
1731 Reconstitution of the human chaperonin CCT by co-expression of the eight  
1732 distinct subunits in mammalian cells. *PROTEIN Expr. Purif.*, **82**, 61–69.
- 1733 9. Akhtar,W., de Jong,J., Pindyurin,A. V., Pagie,L., Meuleman,W., de Ridder,J.,  
1734 Berns,A., Wessels,L.F.A., van Lohuizen,M. and van Steensel,B. (2013)  
1735 Chromatin position effects assayed by thousands of reporters integrated in  
1736 parallel. *Cell*, **154**, 914–27.
- 1737 10. Chen,M., Licon,K., Otsuka,R., Pillus,L. and Ideker,T. (2013) Decoupling  
1738 Epigenetic and Genetic Effects through Systematic Analysis of Gene  
1739 Position. *Cell Rep.*, **3**, 128–37.
- 1740 11. Robertson,G., Garrick,D., Wu,W., Kearns,M., Martin,D. and Whitelaw,E.  
1741 (1995) Position-dependent variegation of globin transgene expression in  
1742 mice. *Proc. Natl. Acad. Sci. U. S. A.*, **92**, 5371–5.
- 1743 12. Girton,J.R. and Johansen,K.M. (2008) Chromatin structure and the regulation  
1744 of gene expression: the lessons of PEV in Drosophila. *Adv. Genet.*, **61**, 1–  
1745 43.
- 1746 13. Ramunas,J., Montgomery,H.J., Kelly,L., Sukonnik,T., Ellis,J. and Jervis,E.J.  
1747 (2007) Real-time fluorescence tracking of dynamic transgene variegation in  
1748 stem cells. *Mol. Ther.*, **15**, 810–7.
- 1749 14. Tchasovnikarova,I.A., Timms,R.T., Matheson,N.J., Wals,K., Antrobus,R.,  
1750 Gottgens,B., Dougan,G., Dawson,M.A. and Lehner,P.J. (2015) Epigenetic  
1751 silencing by the HUSH complex mediates position-effect variegation in  
1752 human cells. *Science (80- )*, **348**, 1481–1485.
- 1753 15. Karpen,G.H. (1994) Position-effect variegation and the new biology of  
1754 heterochromatin. *Curr. Opin. Genet. Dev.*, **4**, 281–91.
- 1755 16. He,J., Yang,Q. and Chang,L.-J. (2005) Dynamic DNA Methylation and  
1756 Histone Modifications Contribute to Lentiviral Transgene Silencing in Murine  
1757 Embryonic Carcinoma Cells. *J. Virol.*, **79**, 13497–13508.
- 1758 17. Suzuki,M., Kasai,K. and Saeki,Y. (2006) Plasmid DNA sequences present in



- 1759 conventional herpes simplex virus amplicon vectors cause rapid transgene  
1760 silencing by forming inactive chromatin. *J. Virol.*, **80**, 3293–300.
- 1761 18. Scrabble,H. and Stambrook,P.J. (1999) A genetic program for deletion of  
1762 foreign DNA from the mammalian genome. *Mutat. Res.*, **429**, 225–37.
- 1763 19. Minoguchi,S. and Iba,H. (2008) Instability of retroviral DNA methylation in  
1764 embryonic stem cells. *Stem Cells*, **26**, 1166–73.
- 1765 20. Dorer,D.R. and Henikoff,S. (1997) Transgene repeat arrays interact with  
1766 distant heterochromatin and cause silencing in cis and trans. *Genetics*, **147**,  
1767 1181–90.
- 1768 21. Garrick,D., Fiering,S., Martin,D.I. and Whitelaw,E. (1998) Repeat-induced  
1769 gene silencing in mammals. *Nat. Genet.*, **18**, 56–9.
- 1770 22. Laker,C., Meyer,J., Schopen, a, Friel,J., Heberlein,C., Ostertag,W. and  
1771 Stocking,C. (1998) Host cis-mediated extinction of a retrovirus permissive for  
1772 expression in embryonal stem cells during differentiation. *J. Virol.*, **72**, 339–  
1773 348.
- 1774 23. Herbst,F., Ball,C.R., Tuorto,F., Nowrouzi,A., Wang,W., Zavidij,O.,  
1775 Dieter,S.M., Fessler,S., van der Hoeven,F., Kloz,U., *et al.* (2012) Extensive  
1776 methylation of promoter sequences silences lentiviral transgene expression  
1777 during stem cell differentiation in vivo. *Mol. Ther.*, **20**, 1014–21.
- 1778 24. Hotta,A. and Ellis,J. (2008) Retroviral vector silencing during iPS cell  
1779 induction: an epigenetic beacon that signals distinct pluripotent states. *J.*  
1780 *Cell. Biochem.*, **105**, 940–8.
- 1781 25. Brophy,J.A.N. and Voigt,C.A. (2014) Principles of genetic circuit design. *Nat.*  
1782 *Methods*, **11**, 508.
- 1783 26. Pikaart,M.J., Recillas-Targa,F. and Felsenfeld,G. (1998) Loss of  
1784 transcriptional activity of a transgene is accompanied by DNA methylation  
1785 and histone deacetylation and is prevented by insulators. *Genes Dev.*, **12**,  
1786 2852–2862.
- 1787 27. Emery,D.W., Yannaki,E., Tubb,J. and Stamatoyannopoulos,G. (2000) A  
1788 chromatin insulator protects retrovirus vectors from chromosomal position  
1789 effects. *Proc. Natl. Acad. Sci.*, **97**, 9150–9155.
- 1790 28. Grosveld,F., van Assendelft,G.B., Greaves,D.R. and Kollias,G. (1987)  
1791 Position-independent, high-level expression of the human beta-globin gene  
1792 in transgenic mice. *Cell*, **51**, 975–85.
- 1793 29. Guy,L.G., Kothary,R., DeRepentigny,Y., Delvoeye,N., Ellis,J. and Wall,L.  
1794 (1996) The beta-globin locus control region enhances transcription of but  
1795 does not confer position-independent expression onto the lacZ gene in  
1796 transgenic mice. *EMBO J.*, **15**, 3713–21.
- 1797 30. Phi-Van,L., von Kries,J.P., Ostertag,W. and Strätling,W.H. (1990) The  
1798 chicken lysozyme 5' matrix attachment region increases transcription from a  
1799 heterologous promoter in heterologous cells and dampens position effects  
1800 on the expression of transfected genes. *Mol. Cell. Biol.*, **10**, 2302–7.
- 1801 31. Kim,J.M., Kim,J.S., Park,D.H., Kang,H.S., Yoon,J., Baek,K. and Yoon,Y.  
1802 (2004) Improved recombinant gene expression in CHO cells using matrix  
1803 attachment regions. *J. Biotechnol.*, **107**, 95–105.
- 1804 32. Williams,S., Mustoe,T., Mulcahy,T., Griffiths,M., Simpson,D., Antoniou,M.,

- 1805 Irvine,A., Mountain,A. and Crombie,R. (2005) CpG-island fragments from the  
1806 HNRPA2B1/CBX3 genomic locus reduce silencing and enhance transgene  
1807 expression from the hCMV promoter/enhancer in mammalian cells. *BMC*  
1808 *Biotechnol.*, **5**, 17.
- 1809 33. Müller-Kuller,U., Ackermann,M., Kolodziej,S., Brendel,C., Fritsch,J.,  
1810 Lachmann,N., Kunkel,H., Lausen,J., Schambach,A., Moritz,T., *et al.* (2015)  
1811 A minimal ubiquitous chromatin opening element (UCOE) effectively  
1812 prevents silencing of juxtaposed heterologous promoters by epigenetic  
1813 remodeling in multipotent and pluripotent stem cells. *Nucleic Acids Res.*, **43**,  
1814 1577–92.
- 1815 34. Kwaks,T.H.J., Barnett,P., Hemrika,W., Siersma,T., Sewalt,R.G.A.B.,  
1816 Satijn,D.P.E., Brons,J.F., van Blokland,R., Kwakman,P., Kruckeberg,A.L., *et*  
1817 *al.* (2003) Identification of anti-repressor elements that confer high and  
1818 stable protein production in mammalian cells. *Nat. Biotechnol.*, **21**, 553–8.
- 1819 35. Grandchamp,N., Henriot,D., Philippe,S., Amar,L., Ursulet,S., Serguera,C.,  
1820 Mallet,J. and Sarkis,C. (2011) Influence of insulators on transgene  
1821 expression from integrating and non-integrating lentiviral vectors. *Genet.*  
1822 *Vaccines Ther.*, **9**, 1.
- 1823 36. Truffinet,V., Guglielmi,L., Cogné,M. and Denizot,Y. (2005) The chicken beta-  
1824 globin HS4 insulator is not a silver bullet to obtain copy-number dependent  
1825 expression of transgenes in stable B cell transfectants. *Immunol. Lett.*, **96**,  
1826 303–4.
- 1827 37. Bharadwaj,R.R., Trainor,C.D., Pasceri,P. and Ellis,J. (2003) LCR-regulated  
1828 transgene expression levels depend on the Oct-1 site in the AT-rich region  
1829 of beta -globin intron-2. *Blood*, **101**, 1603–10.
- 1830 38. Lufino,M.M.P., Edser,P.A.H. and Wade-Martins,R. (2008) Advances in high-  
1831 capacity extrachromosomal vector technology: Episomal maintenance,  
1832 vector delivery, and transgene expression. *Mol. Ther.*, **16**, 1525–1538.
- 1833 39. Ehrhardt,A., Haase,R., Schepers,A., Deutsch,M.J., Lipps,H.J. and Baiker,A.  
1834 (2008) Episomal vectors for gene therapy. *Curr. Gene Ther.*, **8**, 147–61.
- 1835 40. Conese,M., Auriche,C. and Ascenzioni,F. (2004) Gene therapy progress and  
1836 prospects: episomally maintained self-replicating systems. *Gene Ther.*, **11**,  
1837 1735–41.
- 1838 41. Van Craenenbroeck,K., Vanhoenacker,P. and Haegeman,G. (2000)  
1839 Episomal vectors for gene expression in mammalian cells. *Eur. J. Biochem.*,  
1840 **267**, 5665–78.
- 1841 42. Frappier,L. (2012) Contributions of Epstein-Barr nuclear antigen 1 (EBNA1)  
1842 to cell immortalization and survival. *Viruses*, **4**, 1537–47.
- 1843 43. Piechaczek,C., Fetzner,C., Baiker,A., Bode,J. and Lipps,H.J. (1999) A vector  
1844 based on the SV40 origin of replication and chromosomal S/MARs replicates  
1845 episomally in CHO cells. *Nucleic Acids Res.*, **27**, 426–428.
- 1846 44. Baiker,A., Maercker,C., Piechaczek,C., Schmidt,S.B., Bode,J., Benham,C.  
1847 and Lipps,H.J. (2000) Mitotic stability of an episomal vector containing a  
1848 human scaffold/matrix-attached region is provided by association with  
1849 nuclear matrix. *Nat. Cell Biol.*, **2**, 182–4.
- 1850 45. Jenke,A.C.W., Stehle,I.M., Herrmann,F., Eisenberger,T., Baiker,A., Bode,J.,

- 1851 Fackelmayer, F.O. and Lipps, H.J. (2004) Nuclear scaffold/matrix attached  
1852 region modules linked to a transcription unit are sufficient for replication and  
1853 maintenance of a mammalian episome. *Proc. Natl. Acad. Sci.*, **101**, 11322–  
1854 11327.
- 1855 46. Stehle, I.M., Postberg, J., Rupprecht, S., Cremer, T., Jackson, D.A. and  
1856 Lipps, H.J. (2007) Establishment and mitotic stability of an extra-  
1857 chromosomal mammalian replicon. *BMC Cell Biol.*, **8**, 1–12.
- 1858 47. Argyros, O., Wong, S.P., Niceta, M., Waddington, S.N., Howe, S.J., Coutelle, C.,  
1859 Miller, a D. and Harbottle, R.P. (2008) Persistent episomal transgene  
1860 expression in liver following delivery of a scaffold/matrix attachment region  
1861 containing non-viral vector. *Gene Ther.*, **15**, 1593–1605.
- 1862 48. Tessadori, F., Zeng, K., Manders, E., Riool, M., Jackson, D. and van Driel, R.  
1863 (2010) Stable S/MAR-based episomal vectors are regulated at the chromatin  
1864 level. *Chromosome Res.*, **18**, 757–75.
- 1865 49. Chen, Z.Y., He, C.Y., Meuse, L. and Kay, M. a (2004) Silencing of episomal  
1866 transgene expression by plasmid bacterial DNA elements in vivo. *Gene  
1867 Ther.*, **11**, 856–864.
- 1868 50. Riu, E., Chen, Z.-Y., Xu, H., He, C.-Y. and Kay, M. a (2007) Histone  
1869 modifications are associated with the persistence or silencing of vector-  
1870 mediated transgene expression in vivo. *Mol. Ther.*, **15**, 1348–55.
- 1871 51. Bian, Q. and Belmont, A.S. (2010) BAC TG-EMBED: one-step method for  
1872 high-level, copy-number-dependent, position-independent transgene  
1873 expression. *Nucleic Acids Res.*, **38**, e127.
- 1874 52. Blaas, L., Musteanu, M., Eferl, R., Bauer, A. and Casanova, E. (2009) Bacterial  
1875 artificial chromosomes improve recombinant protein production in  
1876 mammalian cells. *BMC Biotechnol.*, **9**, 3.
- 1877 53. Zboray, K., Sommeregger, W., Bogner, E., Gili, A., Sterovsky, T., Fauland, K.,  
1878 Grabner, B., Stiedl, P., Moll, H.P., Bauer, A., *et al.* (2015) Heterologous protein  
1879 production using euchromatin-containing expression vectors in mammalian  
1880 cells. *Nucleic Acids Res.*, **43**, e102.
- 1881 54. Chaturvedi, P., Zhao, B., Zimmerman, D.L. and Belmont, A.S. (2018) Stable  
1882 and reproducible transgene expression independent of proliferative or  
1883 differentiated state using BAC TG-EMBED. *Gene Ther.*, **25**, 376–391.
- 1884 55. Fitzsimons, H.L., Bland, R.J. and During, M.J. (2002) Promoters and regulatory  
1885 elements that improve adeno-associated virus transgene expression in the  
1886 brain. *Methods*, **28**, 227–36.
- 1887 56. Brooks, A.R., Harkins, R.N., Wang, P., Qian, H.S., Liu, P. and Rubanyi, G.M.  
1888 (2004) Transcriptional silencing is associated with extensive methylation of  
1889 the CMV promoter following adenoviral gene delivery to muscle. *J. Gene  
1890 Med.*, **6**, 395–404.
- 1891 57. Hong, S., Hwang, D.-Y., Yoon, S., Isacson, O., Ramezani, A., Hawley, R.G. and  
1892 Kim, K.-S. (2007) Functional analysis of various promoters in lentiviral  
1893 vectors at different stages of in vitro differentiation of mouse embryonic stem  
1894 cells. *Mol. Ther.*, **15**, 1630–9.
- 1895 58. Chen, C., Krohn, J., Bhattacharya, S. and Davies, B. (2011) A comparison of  
1896 exogenous promoter activity at the ROSA26 locus using a PhiC31 integrase

- 1897 mediated cassette exchange approach in mouse ES cells. *PLoS One*, **6**,  
1898 e23376.
- 1899 59. Qin, J.Y., Zhang, L., Clift, K.L., Huler, I., Xiang, A.P., Ren, B.-Z. and Lahn, B.T.  
1900 (2010) Systematic comparison of constitutive promoters and the  
1901 doxycycline-inducible promoter. *PLoS One*, **5**, e10611.
- 1902 60. Hong, S., Hwang, D.D., Yoon, S., Isacson, O., Ramezani, A., Hawley, R.G. and  
1903 Kim, K. (2007) Functional analysis of various promoters in lentiviral vectors at  
1904 different stages of in vitro differentiation of mouse embryonic stem cells. *Mol.*  
1905 *Ther.*, **15**, 1630–9.
- 1906 61. Rozen, S. and Skaletsky, H. (2000) Primer3 on the WWW for general users  
1907 and for biologist programmers. *Methods Mol. Biol.*, **132**, 365–86.
- 1908 62. Ye, J., Coulouris, G., Zaretskaya, I., Cutcutache, I., Rozen, S. and Madden, T.L.  
1909 (2012) Primer-BLAST: A tool to design target-specific primers for  
1910 polymerase chain reaction. *BMC Bioinformatics*, **13**, 134.
- 1911 63. Khanna, N., Bian, Q., Plutz, M. and Belmont, A.S. (2013) BAC manipulations for  
1912 making BAC transgene arrays. *Methods Mol. Biol.*, **1042**, 197–210.
- 1913 64. Warming, S., Costantino, N., Court, D.L., Jenkins, N.A. and Copeland, N.G.  
1914 (2005) Simple and highly efficient BAC recombineering using galK selection.  
1915 *Nucleic Acids Res.*, **33**, e36.
- 1916 65. Bian, Q., Khanna, N., Alvikas, J. and Belmont, A.S. (2013)  $\beta$ -Globin cis-  
1917 elements determine differential nuclear targeting through epigenetic  
1918 modifications. *J. Cell Biol.*, **203**, 767–83.
- 1919 66. Strukov, Y.G. and Belmont, a. S. (2008) Development of Mammalian Cell  
1920 Lines with lac Operator-Tagged Chromosomes. *Cold Spring Harb. Protoc.*,  
1921 **2008**, pdb.prot4903-pdb.prot4903.
- 1922 67. Sambrook, J. and Russell, D.W. (2006) Purification of Nucleic Acids by  
1923 Extraction with Phenol:Chloroform. *Cold Spring Harb. Protoc.*, **2006**,  
1924 pdb.prot4455.
- 1925 68. Dernburg, A.F. (2011) Fragmentation and labeling of probe DNA for whole-  
1926 mount FISH in *Drosophila*. *Cold Spring Harb. Protoc.*, **2011**, 1527–30.
- 1927 69. Solovei, I. and Cremer, M. (2010) 3D-FISH on cultured cells combined with  
1928 immunostaining. *Methods Mol. Biol.*, **659**, 117–26.
- 1929 70. Cremer, M., Grasser, F., Lanctôt, C., Müller, S., Neusser, M., Zinner, R.,  
1930 Solovei, I. and Cremer, T. (2008) Multicolor 3D fluorescence in situ  
1931 hybridization for imaging interphase chromosomes. *Methods Mol. Biol.*, **463**,  
1932 205–39.
- 1933 71. Beatty, B.G. and Scherer, S.W. (2002) Human chromosome mapping of single  
1934 copy genes. *FISH A Pract. approach. B. Beatty, S. Mai, J. Squire, Ed.*  
1935 *Oxford Univ. Press. Oxford.*
- 1936 72. Mowiol mounting medium (2006) *Cold Spring Harb. Protoc.*, **2006**,  
1937 pdb.rec10255.
- 1938 73. Schindelin, J., Arganda-Carreras, I., Frise, E., Kaynig, V., Longair, M.,  
1939 Pietzsch, T., Preibisch, S., Rueden, C., Saalfeld, S., Schmid, B., *et al.* (2012)  
1940 Fiji: an open-source platform for biological-image analysis. *Nat. Methods*, **9**,  
1941 676–82.
- 1942 74. Khan, S.R. and Kuzminov, A. (2017) Degradation of RNA during lysis of

- 1943 Escherichia coli cells in agarose plugs breaks the chromosome. *PLoS One*,  
1944 **12**, e0190177.
- 1945 75. Sambrook, J. and Russell, D.W. (2006) Preparation of DNA for Pulsed-field  
1946 Gel Electrophoresis: Isolation of DNA from Mammalian Cells and Tissues.  
1947 *Cold Spring Harb. Protoc.*, **2006**, pdb.prot4030.
- 1948 76. Kimura, M., Stone, R.C., Hunt, S.C., Skurnick, J., Lu, X., Cao, X., Harley, C.B.  
1949 and Aviv, A. (2010) Measurement of telomere length by the Southern blot  
1950 analysis of terminal restriction fragment lengths. *Nat. Protoc.*, **5**, 1596–607.
- 1951 77. Sambrook, J. and Russell, D.W. (2006) Southern Hybridization of  
1952 Radiolabeled Probes to Nucleic Acids Immobilized on Membranes. *Cold  
1953 Spring Harb. Protoc.*, **2006**, pdb.prot4044.
- 1954 78. Venkatraman, E.S. and Olshen, A.B. (2007) A faster circular binary  
1955 segmentation algorithm for the analysis of array CGH data. *Bioinformatics*,  
1956 **23**, 657–663.
- 1957 79. Olshen, A.B., Venkatraman, E.S., Lucito, R. and Wigler, M. (2004) Circular  
1958 binary segmentation for the analysis of array-based DNA copy number data.  
1959 *Biostatistics*, **5**, 557–572.
- 1960 80. Gibson, D.G., Young, L., Chuang, R.-Y., Venter, J.C., Hutchison, C.A. and  
1961 Smith, H.O. (2009) Enzymatic assembly of DNA molecules up to several  
1962 hundred kilobases. *Nat. Methods*, **6**, 343–5.
- 1963 81. Shao, Z. and Zhao, H. (2012) DNA assembler: A synthetic biology tool for  
1964 characterizing and engineering natural product gene clusters 1st ed. Elsevier  
1965 Inc.
- 1966 82. Shao, Z., Zhao, H.H. and Zhao, H.H. (2009) DNA assembler, an in vivo genetic  
1967 method for rapid construction of biochemical pathways. *Nucleic Acids Res.*,  
1968 **37**, e16.
- 1969 83. Gietz, R.D. and Schiestl, R.H. (2007) Large-scale high-efficiency yeast  
1970 transformation using the LiAc/SS carrier DNA/PEG method. *Nat. Protoc.*, **2**,  
1971 38–41.
- 1972 84. Schorpp, M., Jager, R., Schellander, K., Schenkel, J., Wagner, E.F., Weiher, H.  
1973 and Angel, P. (1996) The Human Ubiquitin C Promoter Directs High  
1974 Ubiquitous Expression of Transgenes in Mice. *Nucleic Acids Res.*, **24**, 1787–  
1975 1788.
- 1976 85. Mizushima, S. and Nagata, S. (1990) pEF-BOS, a powerful mammalian  
1977 expression vector. *Nucleic Acids Res.*, **18**, 5322.
- 1978 86. Lois, C., Hong, E.J., Pease, S., Brown, E.J. and Baltimore, D. (2002) Germline  
1979 transmission and tissue-specific expression of transgenes delivered by  
1980 lentiviral vectors. *Science*, **295**, 868–72.
- 1981 87. Hong Cai, J., Deng, S., Kumpf, S., Lee, P., Zagouras, P., Ryan, A. and  
1982 Gallagher, D. (2007) Validation of rat reference genes for improved  
1983 quantitative gene expression analysis using low density arrays.  
1984 *Biotechniques*, **42**, 503–512.
- 1985 88. de Jonge, H.J.M., Fehrmann, R.S.N., de Bont, E.S.J.M., Hofstra, R.M.W.,  
1986 Gerbens, F., Kamps, W. a, de Vries, E.G.E., van der Zee, A.G.J., te  
1987 Meerman, G.J. and ter Elst, A. (2007) Evidence based selection of  
1988 housekeeping genes. *PLoS One*, **2**, e898.

- 1989 89. Zhu,J., He,F., Song,S., Wang,J. and Yu,J. (2008) How many human genes  
1990 can be defined as housekeeping with current expression data? *BMC*  
1991 *Genomics*, **9**, 172.
- 1992 90. She,X., Rohl,C. a, Castle,J.C., Kulkarni,A. V, Johnson,J.M. and Chen,R.  
1993 (2009) Definition, conservation and epigenetics of housekeeping and tissue-  
1994 enriched genes. *BMC Genomics*, **10**, 269.
- 1995 91. Zambrowicz,B.P., Imamoto, a, Fiering,S., Herzenberg,L. a, Kerr,W.G. and  
1996 Soriano,P. (1997) Disruption of overlapping transcripts in the ROSA beta  
1997 geo 26 gene trap strain leads to widespread expression of beta-  
1998 galactosidase in mouse embryos and hematopoietic cells. *Proc. Natl. Acad.*  
1999 *Sci. U. S. A.*, **94**, 3789–94.
- 2000 92. Bertulat,B., de Bonis,M.L., Della Ragione,F., Lehmkuhl,A., Mildner,M.,  
2001 Storm,C., Jost,K.L., Scala,S., Hendrich,B., D’Esposito,M., *et al.* (2012)  
2002 MeCP2 Dependent Heterochromatin Reorganization during Neural  
2003 Differentiation of a Novel Mecp2-Deficient Embryonic Stem Cell Reporter  
2004 Line. *PLoS One*, **7**.
- 2005 93. Hu,Y., Plutz,M. and Belmont,A.S. (2010) Hsp70 gene association with  
2006 nuclear speckles is Hsp70 promoter specific. *J. Cell Biol.*, **191**, 711–9.
- 2007 94. Sinclair,P., Bian,Q., Plutz,M., Heard,E. and Belmont,A.S. (2010) Dynamic  
2008 plasticity of large-scale chromatin structure revealed by self-assembly of  
2009 engineered chromosome regions. *J. Cell Biol.*, **190**, 761–76.
- 2010 95. Hu,Y., Kireev,I., Plutz,M., Ashourian,N. and Belmont,A.S. (2009) Large-scale  
2011 chromatin structure of inducible genes: transcription on a condensed, linear  
2012 template. *J. Cell Biol.*, **185**, 87–100.
- 2013 96. Schwab,M. and Amler,L.C. (1990) Amplification of cellular oncogenes: A  
2014 predictor of clinical outcome in human cancer. *Genes, Chromosom. Cancer*,  
2015 **1**, 181–193.
- 2016 97. Carroll,S.M., DeRose,M.L., Gaudray,P., Moore,C.M., Needham-  
2017 Vandevanter,D.R., Von Hoff,D.D. and Wahl,G.M. (1988) Double minute  
2018 chromosomes can be produced from precursors derived from a  
2019 chromosomal deletion. *Mol. Cell. Biol.*, **8**, 1525–33.
- 2020 98. L’Abbate,A., Macchia,G., D’Addabbo,P., Lonoce,A., Tolomeo,D.,  
2021 Trombetta,D., Kok,K., Bartenhagen,C., Whelan,C.W., Palumbo,O., *et al.*  
2022 (2014) Genomic organization and evolution of double  
2023 minutes/homogeneously staining regions with MYC amplification in human  
2024 cancer. *Nucleic Acids Res.*, **42**, 9131–45.
- 2025 99. Marasini,D. and Fakhr,M. (2014) Exploring PFGE for Detecting Large  
2026 Plasmids in *Campylobacter jejuni* and *Campylobacter coli* Isolated from  
2027 Various Retail Meats. *Pathogens*, **3**, 833–844.
- 2028 100. Barton,B.M., Harding,G.P. and Zuccarelli,A.J. (1995) A general method for  
2029 detecting and sizing large plasmids. *Anal. Biochem.*, **226**, 235–40.
- 2030 101. Walker,P.R., LeBlanc,J. and Sikorska,M. (1997) Evidence that DNA  
2031 fragmentation in apoptosis is initiated and propagated by single-strand  
2032 breaks. *Cell Death Differ.*, **4**, 506–515.
- 2033 102. Richardson,S.M., Mitchell,L.A., Stracquadanio,G., Yang,K., Dymond,J.S.,  
2034 DiCarlo,J.E., Lee,D., Huang,C.L.V., Chandrasegaran,S., Cai,Y., *et al.* (2017)

- 2035 Design of a synthetic yeast genome. *Science*, **355**, 1040–1044.
- 2036 103. Nanbo,A., Sugden,A. and Sugden,B. (2007) The coupling of synthesis and  
2037 partitioning of EBV's plasmid replicon is revealed in live cells. *EMBO J.*, **26**,  
2038 4252–62.
- 2039 104. Kouprina,N., Earnshaw,W.C., Masumoto,H. and Larionov,V. (2013) A new  
2040 generation of human artificial chromosomes for functional genomics and  
2041 gene therapy. *Cell. Mol. Life Sci.*, **70**, 1135–48.
- 2042 105. Mills,W., Critcher,R., Lee,C. and Farr,C.J. (1999) Generation of an  
2043 approximately 2.4 Mb human X centromere-based minichromosome by  
2044 targeted telomere-associated chromosome fragmentation in DT40. *Hum.*  
2045 *Mol. Genet.*, **8**, 751–61.
- 2046 106. Harrington,J.J., Van Bokkelen,G., Mays,R.W., Gustashaw,K. and  
2047 Willard,H.F. (1997) Formation of de novo centromeres and construction of  
2048 first-generation human artificial microchromosomes. *Nat. Genet.*, **15**, 345–  
2049 55.
- 2050 107. Kazuki,Y. and Oshimura,M. (2011) Human artificial chromosomes for gene  
2051 delivery and the development of animal models. *Mol. Ther.*, **19**, 1591–601.
- 2052 108. Kim,J.-H., Kononenko,A., Erliandri,I., Kim,T.-A., Nakano,M., Iida,Y.,  
2053 Barrett,J.C., Oshimura,M., Masumoto,H., Earnshaw,W.C., *et al.* (2011)  
2054 Human artificial chromosome (HAC) vector with a conditional centromere for  
2055 correction of genetic deficiencies in human cells. *Proc. Natl. Acad. Sci. U. S.*  
2056 *A.*, **108**, 20048–53.
- 2057 109. Hiratsuka,M., Uno,N., Ueda,K., Kurosaki,H., Imaoka,N., Kazuki,K., Ueno,E.,  
2058 Akakura,Y., Katoh,M., Osaki,M., *et al.* (2011) Integration-free iPS cells  
2059 engineered using human artificial chromosome vectors. *PLoS One*, **6**,  
2060 e25961.
- 2061 110. Takahashi,Y., Tsuji,S., Kazuki,Y., Noguchi,M., Arifuku,I., Umebayashi,Y.,  
2062 Nakanishi,T., Oshimura,M. and Sato,K. (2010) Development of evaluation  
2063 system for bioactive substances using human artificial chromosome-  
2064 mediated osteocalcin gene expression. *J. Biochem.*, **148**, 29–34.
- 2065 111. Kazuki,Y., Hiratsuka,M., Takiguchi,M., Osaki,M., Kajitani,N., Hoshiya,H.,  
2066 Hiramatsu,K., Yoshino,T., Kazuki,K., Ishihara,C., *et al.* (2010) Complete  
2067 genetic correction of ips cells from Duchenne muscular dystrophy. *Mol.*  
2068 *Ther.*, **18**, 386–93.
- 2069 112. Larin,Z. and Mejía,J.E. (2002) Advances in human artificial chromosome  
2070 technology. *Trends Genet.*, **18**, 313–319.
- 2071 113. Liskovych,M., Lee,N.C., Larionov,V. and Kouprina,N. (2016) Moving toward  
2072 a higher efficiency of microcell-mediated chromosome transfer. *Mol. Ther.*  
2073 *Methods Clin. Dev.*, **3**, 16043.
- 2074 114. Fournier,R.E. and Ruddle,F.H. (1977) Microcell-mediated transfer of murine  
2075 chromosomes into mouse, Chinese hamster, and human somatic cells.  
2076 *Proc. Natl. Acad. Sci. U. S. A.*, **74**, 319–23.
- 2077 115. Shimizu,N., Miura,Y., Sakamoto,Y. and Tsutsui,K. (2001) Plasmids with a  
2078 mammalian replication origin and a matrix attachment region initiate the  
2079 event similar to gene amplification. *Cancer Res.*, **61**, 6987–6990.
- 2080 116. Shimizu,N., Hashizume,T., Shingaki,K. and Kawamoto,J.K. (2003)

- 2081           Amplification of plasmids containing a mammalian replication initiation region  
2082           is mediated by controllable conflict between replication and transcription.  
2083           *Cancer Res.*, **63**, 5281–5290.
- 2084   117. Shimizu,N., Shingaki,K. and Kaneko-sasaguri,Y. (2005) When , where and  
2085           how the bridge breaks : anaphase bridge breakage plays a crucial role in  
2086           gene amplification and HSR generation. **302**, 233–243.
- 2087   118. Shimizu,N. (2009) Extrachromosomal double minutes and chromosomal  
2088           homogeneously staining regions as probes for chromosome research.  
2089           *Cytogenet. Genome Res.*, **124**, 312–326.
- 2090   119. Schoenlein,P. V, Shen,D.W., Barrett,J.T., Pastan,I. and Gottesman,M.M.  
2091           (1992) Double minute chromosomes carrying the human multidrug  
2092           resistance 1 and 2 genes are generated from the dimerization of  
2093           submicroscopic circular DNAs in colchicine-selected KB carcinoma cells.  
2094           *Mol Biol Cell*, **3**, 507–520.
- 2095   120. Khanna,N., Hu,Y. and Belmont,A.S.S. (2014) HSP70 Transgene Directed  
2096           Motion to Nuclear Speckles Facilitates Heat Shock Activation. *Curr. Biol.*, **24**,  
2097           1138–1144.  
2098  
2099



Table 1

| Construct    | Heterogeneous clones% | Number of clones |
|--------------|-----------------------|------------------|
| UBC-GFP-ZeoR | 0                     | 58               |
| DHFR-UG      | 60%                   | 30               |
| ROSA-UG      | 76%                   | 38               |
| UBB-UG       | 58%                   | 41               |
| 2207K13-UG   | 69%                   | 35               |
| HBB-UG       | 83%                   | 23               |

Table 2

| Sample Name  | BAC copy number per cell | Episome copy number per cell | BAC copy number per episome | BAC size (kb) | BAC content per episome (kb) |
|--------------|--------------------------|------------------------------|-----------------------------|---------------|------------------------------|
| DHFR-UG-s3   | 15.4                     | 6.2 (n=99)                   | 2.5                         | 178           | 445                          |
| HBB-UG-100d3 | 14.9                     | 4.5 (n=100)                  | 3.3                         | 217           | 716                          |

Table 3

| Sample Name     | BAC copy number per cell | Estimated episome copy number per cell | Minimum copy number increase of episome-localizing DNA relative to L |
|-----------------|--------------------------|----------------------------------------|----------------------------------------------------------------------|
| DHFR-UG-s3_H1   | 49.4                     | 19.8                                   | 5.8                                                                  |
| DHFR-UG-s3_H2   | 57.5                     | 23.1                                   | 6.6                                                                  |
| DHFR-UG-s3_L    | 0.3                      | 0.1                                    | /                                                                    |
| HBB-UG-100d3_H1 | 48.5                     | 14.7                                   | 4.6                                                                  |
| HBB-UG-100d3_H2 | 51.2                     | 15.5                                   | 4.8                                                                  |
| HBB-UG-100d3_L  | 0.2                      | 0.1                                    | /                                                                    |

Figure 1

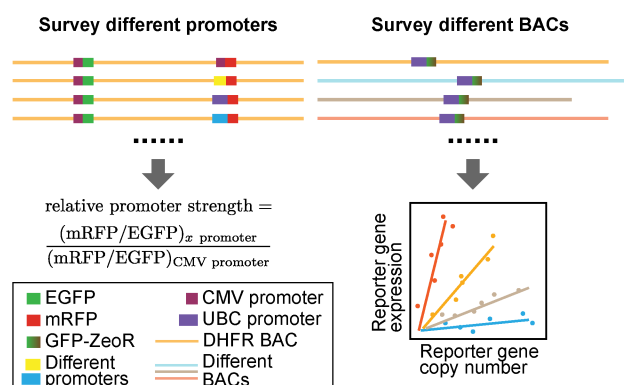

Figure 2

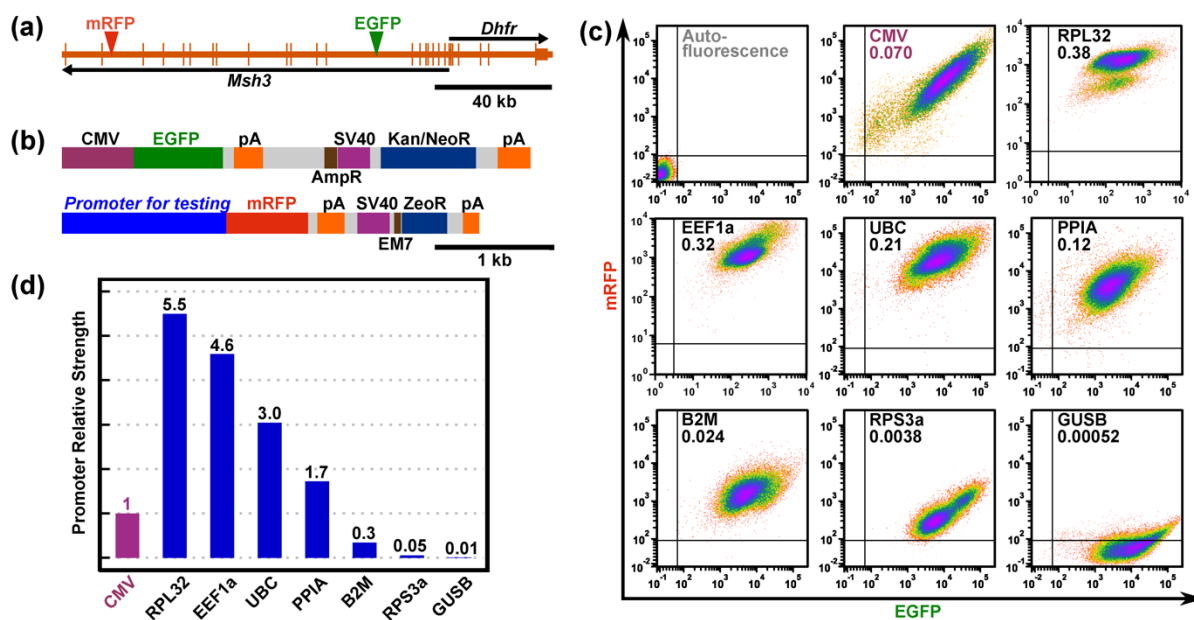

Figure 3

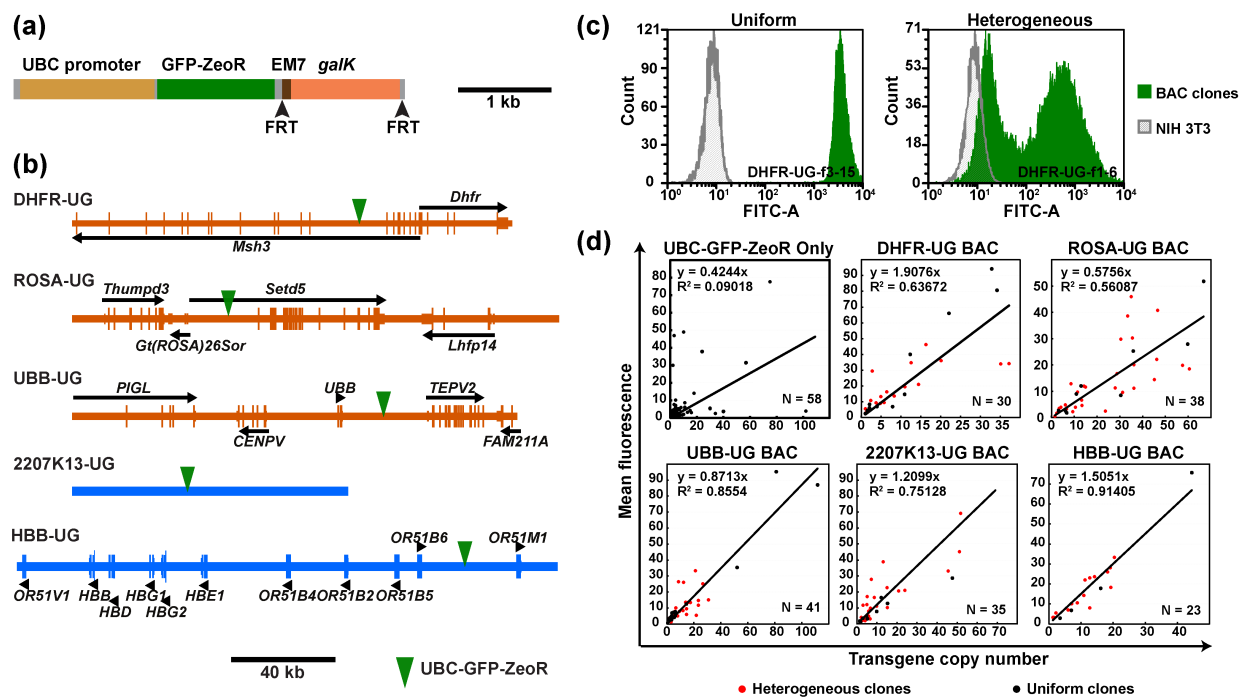

Figure 4

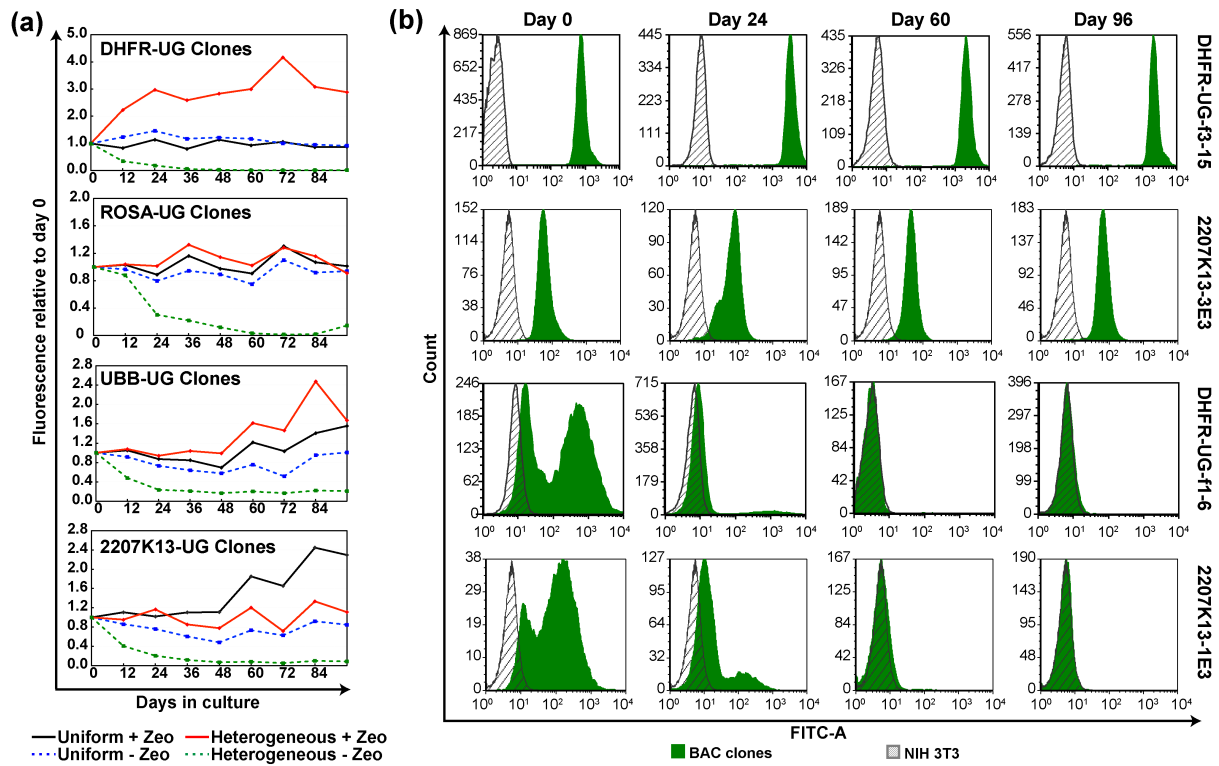

Figure 5

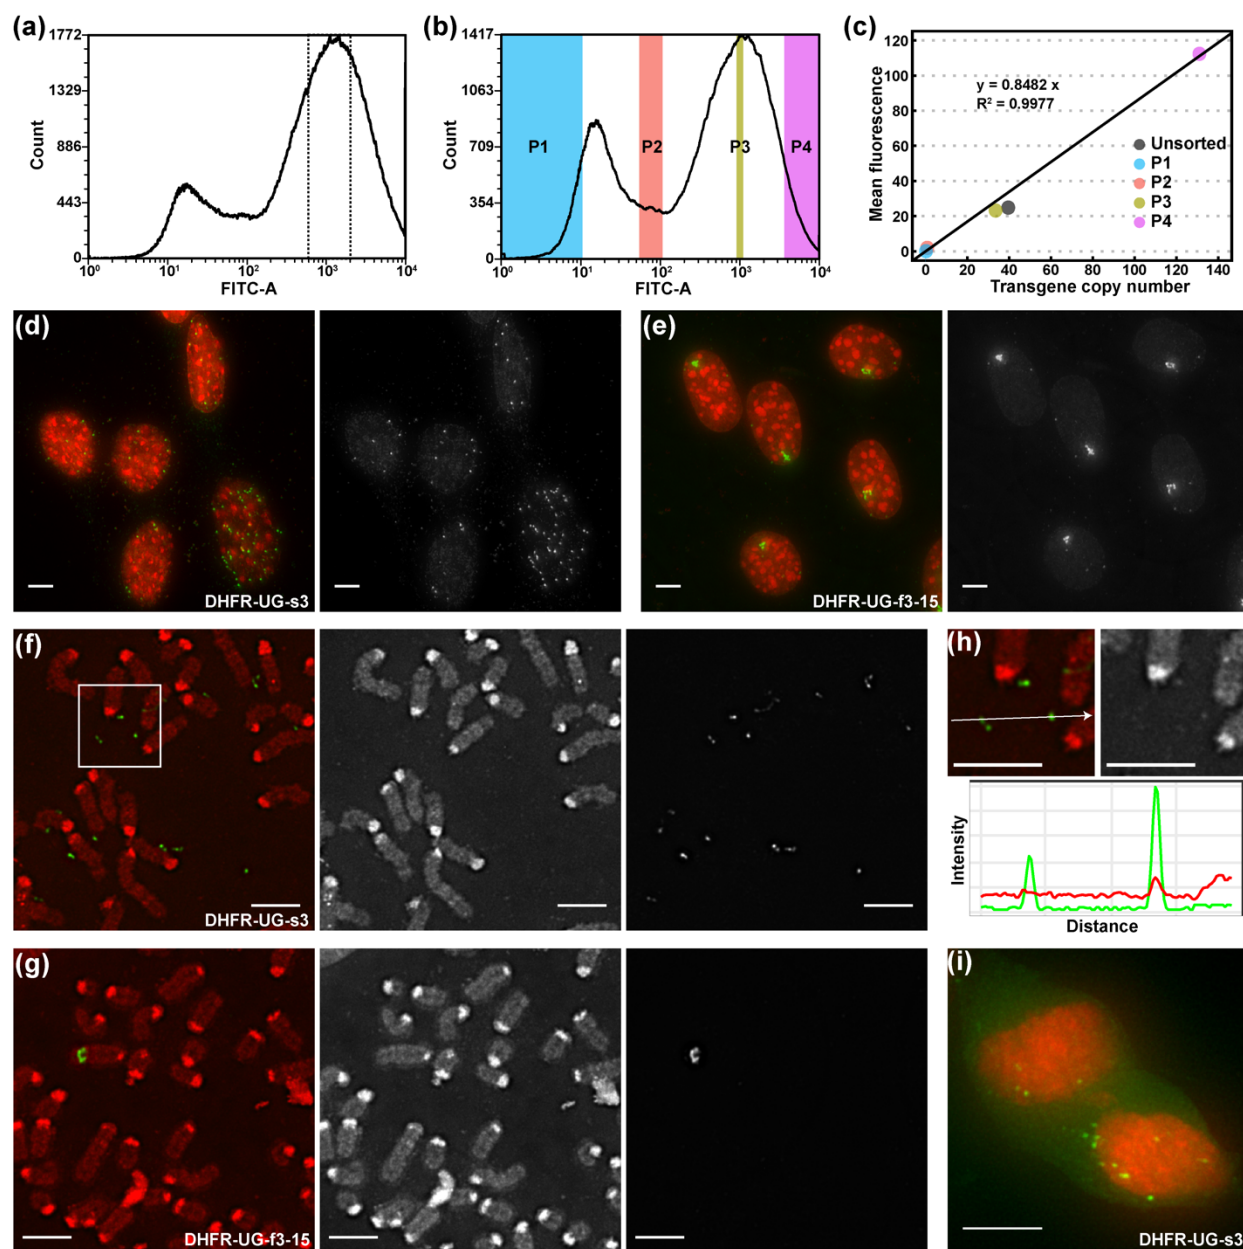

Figure 6

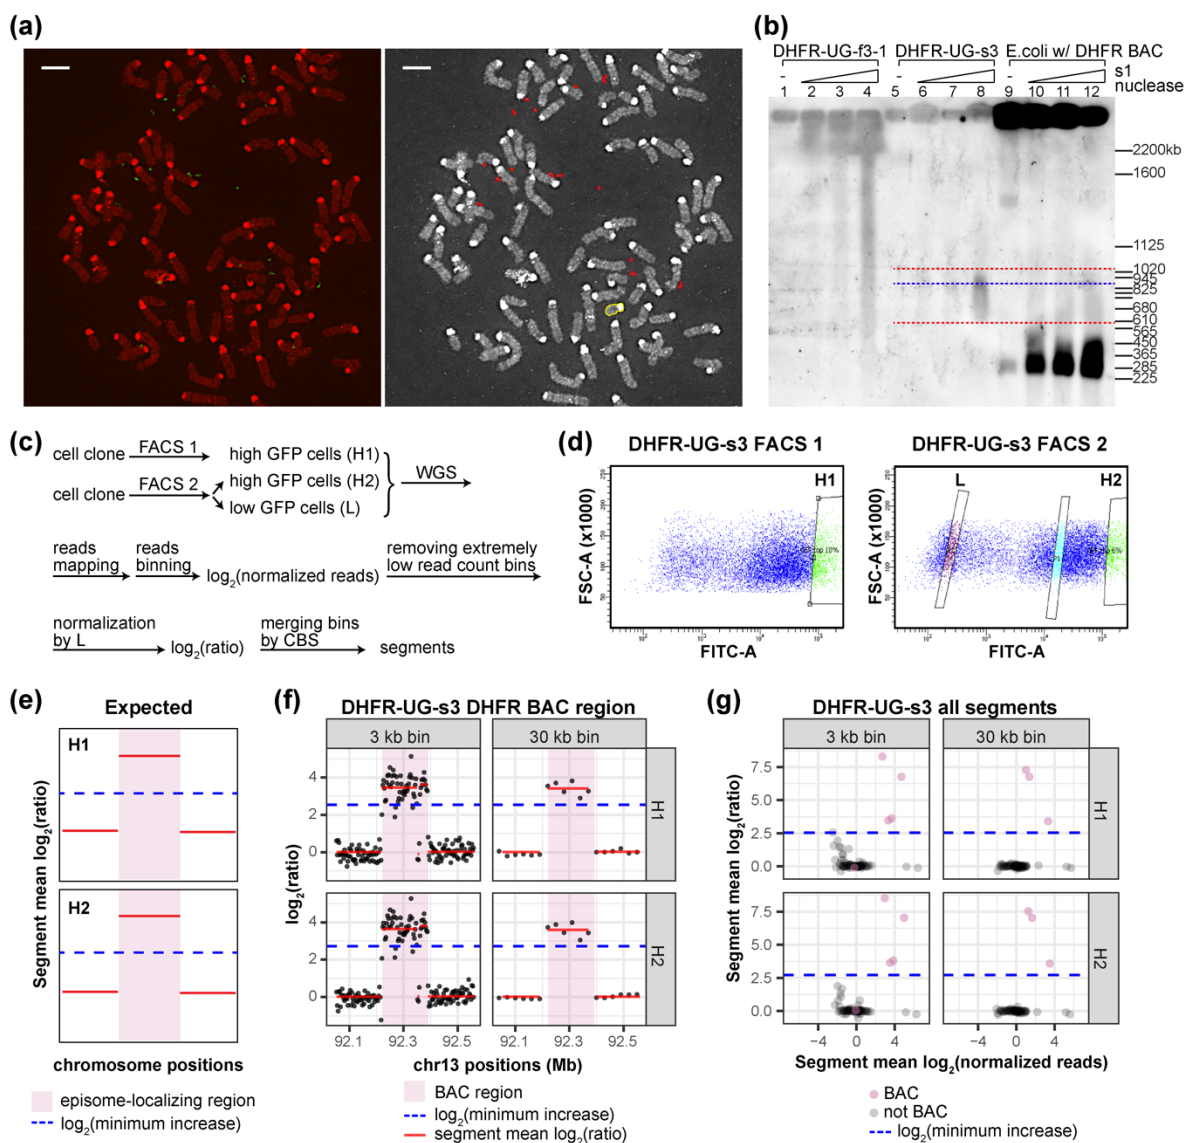

Figure 7

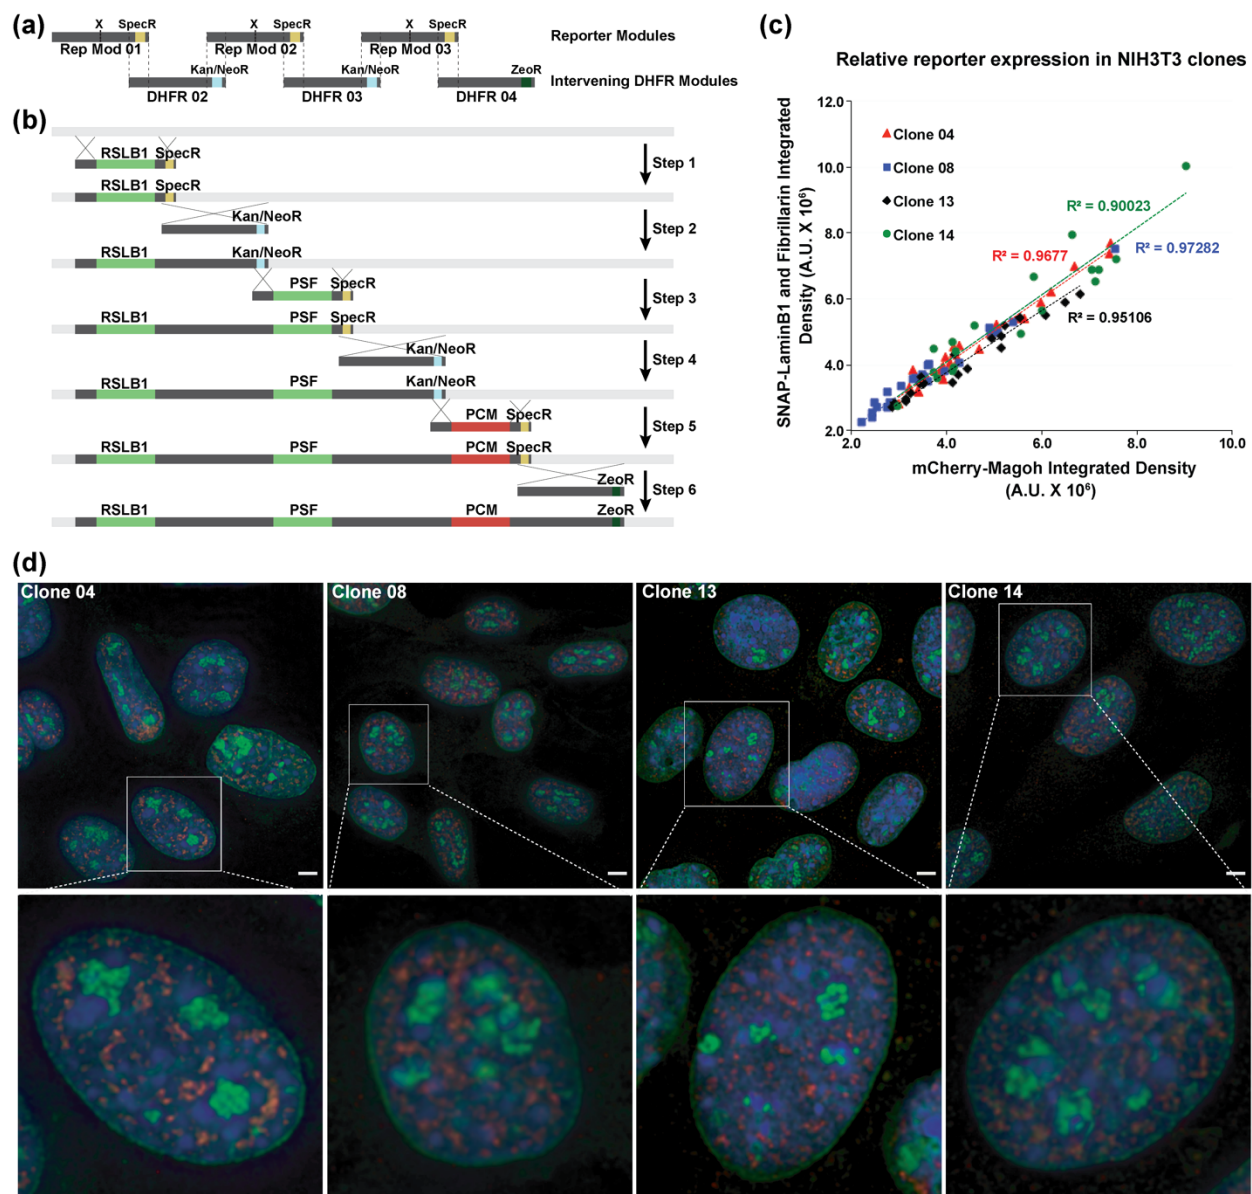

Source: https://www.biorxiv.org/content/10.1101/708024v1.full.pdf
